*Preprint for bioRxiv*

## **Improved vectors and genome-wide libraries for CRISPR screening**

Neville E. Sanjana<sup>1,2,3,4,5</sup>, Ophir Shalem<sup>1,2,3,4,5</sup> and Feng Zhang<sup>1,2,3,4</sup>

<sup>1</sup> Broad Institute of MIT and Harvard  
7 Cambridge Center  
Cambridge, MA 02142, USA

<sup>2</sup> McGovern Institute for Brain Research  
Massachusetts Institute of Technology  
Cambridge, MA 02139, USA

<sup>3</sup> Department of Brain and Cognitive Sciences  
Massachusetts Institute of Technology  
Cambridge, MA 02139, USA

<sup>4</sup> Department of Biological Engineering  
Massachusetts Institute of Technology  
Cambridge, MA 02139, USA

<sup>5</sup> These authors contributed equally to this work.  
email: [zhang@broadinstitute.org](mailto:zhang@broadinstitute.org)

Genome-wide, targeted loss-of-function pooled screens using the CRISPR (clustered regularly interspaced short palindrome repeats)–associated nuclease Cas9 in human and mouse cells provide an alternative screening system to RNA interference (RNAi) and have been used to reveal new mechanisms in diverse biological models<sup>1-4</sup>. Previously, we used a Genome-scale CRISPR Knock-Out (GeCKO) library to identify loss-of-function mutations conferring vemurafenib resistance in a melanoma model<sup>1</sup>. However, initial lentiviral delivery systems for CRISPR screening had low viral titer or required a cell line already expressing Cas9, limiting the range of biological systems amenable to screening.

Here, we sought to improve both the lentiviral packaging and choice of guide sequences in our original GeCKO library<sup>1</sup>, where a pooled library of synthesized oligonucleotides was cloned into a lentiviral backbone containing both the *Streptococcus pyogenes* Cas9 nuclease and the single guide RNA (sgRNA) scaffold. To create a new vector capable of producing higher-titer virus (lentiCRISPRv2), we made several modifications, including removal of one of the nuclear localization signals (NLS), human codon-optimization of the remaining NLS and P2A bicistronic linker sequences, and repositioning of the U6-driven sgRNA cassette (**Fig. 1a**). These changes resulted in a ~10-fold increase in functional viral titer over lentiCRISPRv1<sup>1</sup> (**Fig. 1b**).

To further increase viral titer, we also cloned a two-vector system, in which Cas9 (lentiCas9-Blast) and sgRNA (lentiGuide-Puro) are delivered using separate viral vectors with distinct antibiotic selection markers (**Fig. 1a**). LentiGuide-Puro has a ~100-fold increase in functional viral titer over the original lentiCRISPRv1 (**Fig. 1b**). Both single and dual-vector systems mediate efficient knock-out of a genomically-integrated copy of EGFP in human cells (**Supplementary Fig. 1**). Whereas the dual vector system enables generation of Cas9-expressing cell lines which can be subsequently used for screens using lentiGuide-Puro, the single vector lentiCRISPRv2 may be better suited for *in vivo* or primary cell screening applications.

In addition to the vector improvements, we designed and synthesized new human and mouse GeCKOv2 sgRNA libraries (**Supplementary Methods**) with several improvements (**Table 1**): First, for both human and mouse libraries, to target all genes with a uniform number of sgRNAs, we selected 6 sgRNAs per gene distributed over 3-4 constitutively expressed exons. Second, to further minimize off-target genome modification, we improved the calculation of off-target scores based on specificity analysis<sup>5</sup>. Third, to inactivate microRNAs (miRNAs) which play a key role in transcriptional regulation, we added sgRNAs to direct mutations to the pre-miRNA hairpin structure<sup>6</sup>. Finally, we targeted ~1000 additional genes not included in the original GeCKO library.

Both libraries, mouse and human, are divided into 2 sub-libraries — containing 3 sgRNAs targeting each gene in the genome, as well as 1000 non-targeting control sgRNAs. Screens can be performed by combining both sub-libraries, yielding 6 sgRNAs per gene, for higher coverage. Alternatively, individual sub-libraries can be used in situations where cell numbers are limiting (eg. primary cells, *in vivo* screens). The human and mouse libraries have been cloned into lentiCRISPRv2 and into lentiGuide-Puro and deep sequenced to ensure uniform representation (**Supplementary Fig. 2, 3**). These new lentiCRISPR vectors and human and mouse libraries further improve the GeCKO reagents for diverse screening applications. Reagents are available to the academic community through Addgene and associated protocols, support forums, and computational tools are available via the Zhang lab website ([www.genome-engineering.org](http://www.genome-engineering.org)).

**Acknowledgements:** We also would like to thank the entire Zhang Lab for support and helpful advice. N.S. is supported by a postdoctoral fellowship from the Simons Center for the Social Brain at MIT. O.S. is a Klarman Fellow of the Broad-Israel Partnership. F.Z. is supported by the NIH and NIMH through a Director's Pioneer Award (5DP1-MH100706), a Transformative R01 grant (5R01-DK097768), the Keck, Merkin, Vallee,

Damon Runyon, Searle Scholars, Klingenstein, and Simons Foundations, Bob Metcalfe, and Jane Pauley.

### **Author Contributions**

N.S., O.S., and F.Z. conceived and designed the experiments. N.S. and O.S. performed the experiments and analyzed the data. N.S., O.S., and F.Z. wrote the manuscript.

### **Competing Financial Interests**

A patent application has been filed relating to this work, and the authors plan on making the reagents widely available to the academic community through Addgene and to provide software tools via the Zhang lab website (<http://www.genome-engineering.org/>). F.Z. is a scientific advisor for Editas Medicine.

### **References**

1. Shalem, O. *et al. Science* **343**, 84–87 (2014).
2. Wang, T., Wei, J. J., Sabatini, D. M. & Lander, E. S. *Science* **343**, 80–84 (2014).
3. Koike-Yusa, H., Li, Y., Tan, E.-P., Velasco-Herrera, M. D. C. & Yusa, K. *Nat Biotechnol* **32**, 267–273 (2013).
4. Zhou, Y. *et al. Nature* **509**, 487–491 (2014).
5. Hsu, P. D. *et al. Nat Biotechnol* **31**, 827–832 (2013).
6. Zhao, Y. *et al. Sci Rep* **4**, 3943 (2014).

**Figure 1** | New lentiviral CRISPR designs produce viruses with higher functional titer.

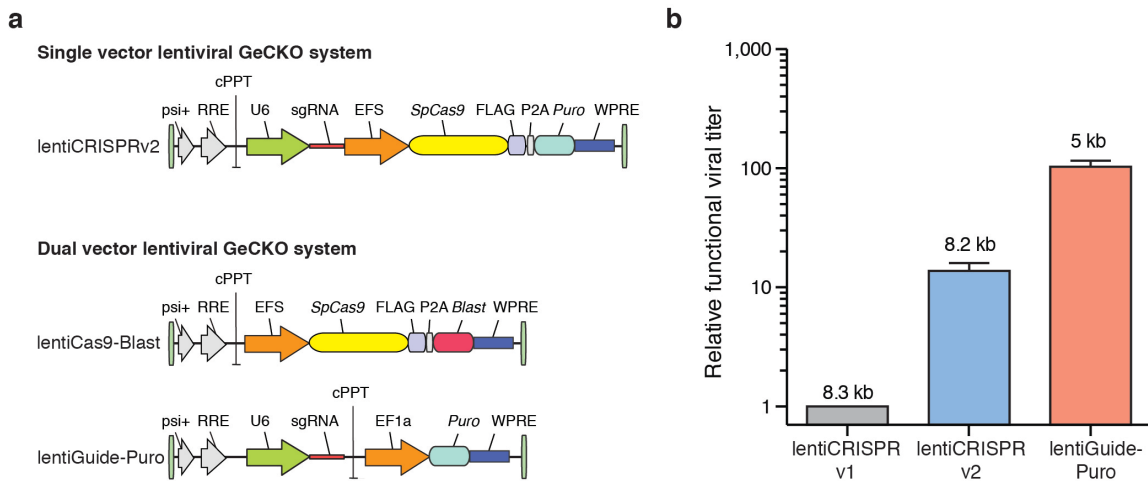

**(a)** Lentiviral expression vector for *Streptococcus pyogenes* Cas9 and sgRNA in the improved one vector system (lentiCRISPR v2) and the two vector system (lentiCas9-Blast, lentiGuide-Puro). Psi packaging signal (psi+), rev response element (RRE), central polypurine tract (cPPT), elongation factor-1 $\alpha$  short promoter (EFS), FLAG octapeptide tag (FLAG), 2A self-cleaving peptide (P2A), puromycin selection marker (puro), posttranscriptional regulatory element (WPRE), blasticidin selection marker (blast), and elongation factor-1 $\alpha$  promoter (EF1a). **(b)** Relative functional viral titer of viruses made from lentiCRISPR v1<sup>1</sup>, lentiCRISPR v2, and lentiGuide-Puro vector with a EGFP-targeting sgRNA ( $n = 3$  independently-transfected virus batches with 3 replicate transductions per construct). HEK293FT cells were transduced with serial dilutions of virus and, after 24 hours, selected using puromycin (1  $\mu$ g/ml). Puromycin-resistant cells were measured after 4 days from the start of selection using the CellTiter-Glo (Promega) luciferase assay. Relative titers were calculated using viral volumes that yielded less than 20% puromycin-resistant cells in order to minimize the number of cells with multiple infections. Numbers above each bar indicate the size of the packaged virus for each construct.

**Table 1** | Comparison of new GeCKO v2 human and mouse sgRNA libraries with existing CRISPR libraries.

|                                       | Wang et al. (2014)<br>library | Shalem et al. (2014)<br>GeCKO v1 library             | Yusa et al. (2014)<br>library        | GeCKO v2<br>human library                                        | GeCKO v2<br>mouse library                                        |
|---------------------------------------|-------------------------------|------------------------------------------------------|--------------------------------------|------------------------------------------------------------------|------------------------------------------------------------------|
| <i>Species</i>                        | human                         | human                                                | mouse                                | human                                                            | mouse                                                            |
| <i>Number of genes targeted</i>       | 7,114                         | 18,080                                               | 19,150                               | 19,050                                                           | 20,611                                                           |
| <i>Targeting constructs per gene</i>  | 10 per gene                   | variable (typically 3 to 4 per gene)                 | variable (typically 4 to 5 per gene) | 6 per gene<br>(3 in Library A,<br>3 in Library B)                | 6 per gene<br>(3 in Library A,<br>3 in Library B)                |
| <i>Number of miRNA targeted</i>       | none                          | none                                                 | none                                 | 1,864                                                            | 1,175                                                            |
| <i>Targeting constructs per miRNA</i> | n/a                           | n/a                                                  | n/a                                  | 4 per miRNA                                                      | 4 per miRNA                                                      |
| <i>Control (non-targeting) sgRNAs</i> | 100                           | none                                                 | none                                 | 1,000                                                            | 1,000                                                            |
| <i>Total sgRNA constructs</i>         | 73,151                        | 64,751                                               | 87,897                               | 123,411<br>(65,383 in Library A,<br>58,028 in Library B)         | 130,209<br>(67,405 in Library A,<br>62,804 in Library B)         |
| <i>Viral plasmid vector</i>           | Dual vector:<br>sgRNA only    | Single vector:<br>Cas9 and sgRNA<br>(lentiCRISPR v1) | Dual vector:<br>sgRNA only           | Single and dual vector:<br>lentiCRISPR v2 and<br>lentiGuide-Puro | Single and dual vector:<br>lentiCRISPR v2 and<br>lentiGuide-Puro |

New GeCKO libraries target an increased number of genes with uniform coverage (6 sgRNAs per gene divided into sub-libraries with 3 sgRNAs per gene). The GeCKO v2 libraries also contain sgRNAs that target microRNAs and control sgRNAs that do not target in the genome. The libraries have been cloned into lentiCRISPR v2 (which includes Cas9 in the same vector) and lentiGuide-Puro (sgRNA-only vector) and are available in either format.

*Supplementary Materials*

**Improved vectors and genome-wide libraries for CRISPR screening**

Neville E. Sanjana<sup>1,2,3,4,5</sup>, Ophir Shalem<sup>1,2,3,4,5</sup> and Feng Zhang<sup>1,2,3,4</sup>

<sup>1</sup> Broad Institute of MIT and Harvard  
7 Cambridge Center  
Cambridge, MA 02142, USA

<sup>2</sup> McGovern Institute for Brain Research

<sup>3</sup> Department of Brain and Cognitive Sciences

<sup>4</sup> Department of Biological Engineering  
Massachusetts Institute of Technology  
Cambridge, MA 02139, USA

<sup>5</sup> These authors contributed equally to this work.  
email: [zhang@broadinstitute.org](mailto:zhang@broadinstitute.org).

**Supplementary Figure 1 | EGFP expression in HEK293T-EGFP cells after transduction with different lentiviral CRISPR constructs.**

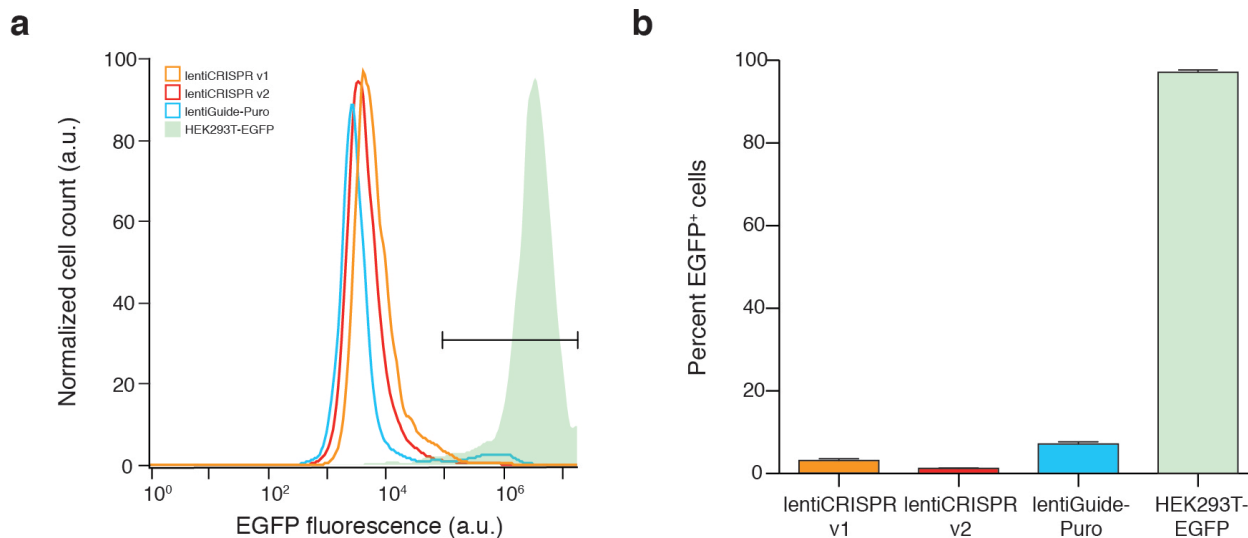

**(a)** Representative histograms of EGFP fluorescence from single transductions of HEK293T-EGFP cells with lentiCRISPR v1, lentiCRISPR v2, lentiGuide-Puro or no virus. For lentiGuide-Puro, HEK293T-EGFP cells had previously been transduced with lentiCas9-Blast and selected for 4 days with blasticidin. Twenty-four hours after transduction, cells were selected in puromycin and then analyzed by flow cytometry at 7 days after infection. **(b)** Percentage of EGFP positive cells (as given by gate drawn in **a**) per viral construct (error bars indicate s.e.m,  $n=3$  biological replicate transductions).



## Supplementary Figure 2 | Sequencing of human GeCKOv2 libraries cloned into lentiCRISPRv2 and lentiGuide-Puro.

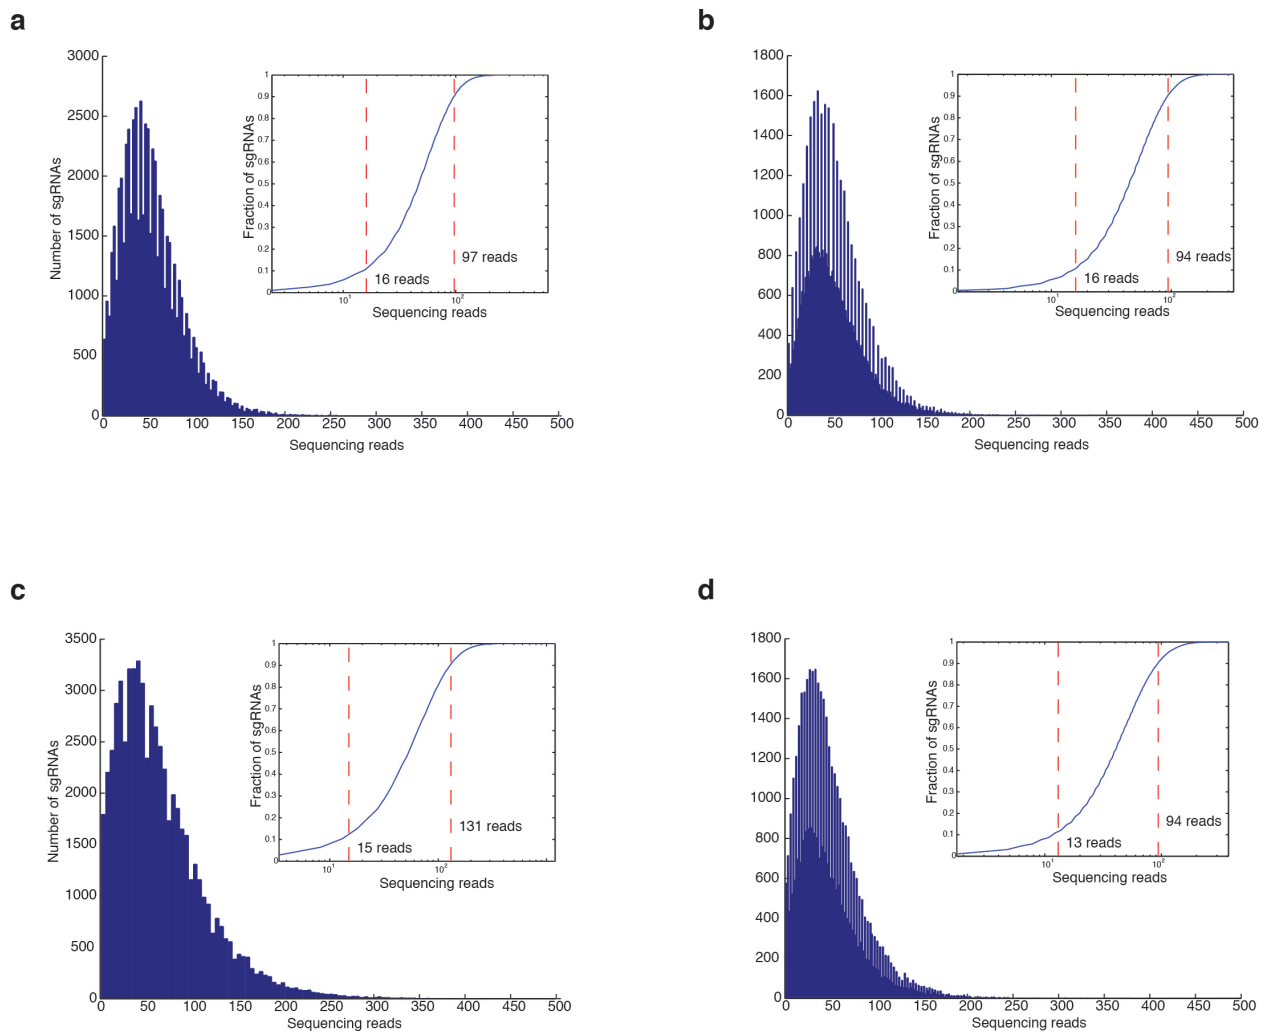

Histograms of sgRNA representation after cloning each half-library into sgRNA vectors. Inset: Cumulative distribution of sequencing reads. The number of sequencing reads for the 10<sup>th</sup> and 90<sup>th</sup> sgRNA percentile is indicated by the dashed red lines and text labels. All library sequencing was performed with PCR replicates; only one replicate is shown for each half-library. **(a,b)** Human GeCKOv2 library A **(a)** and library B **(b)** in lentiCRISPRv2. **(c,d)** Human GeCKOv2 library A **(c)** and B **(d)** in lentiGuide-Puro.

### Supplementary Figure 3 | Sequencing of mouse GeCKOv2 libraries cloned into lentiCRISPRv2 and lentiGuide-Puro.

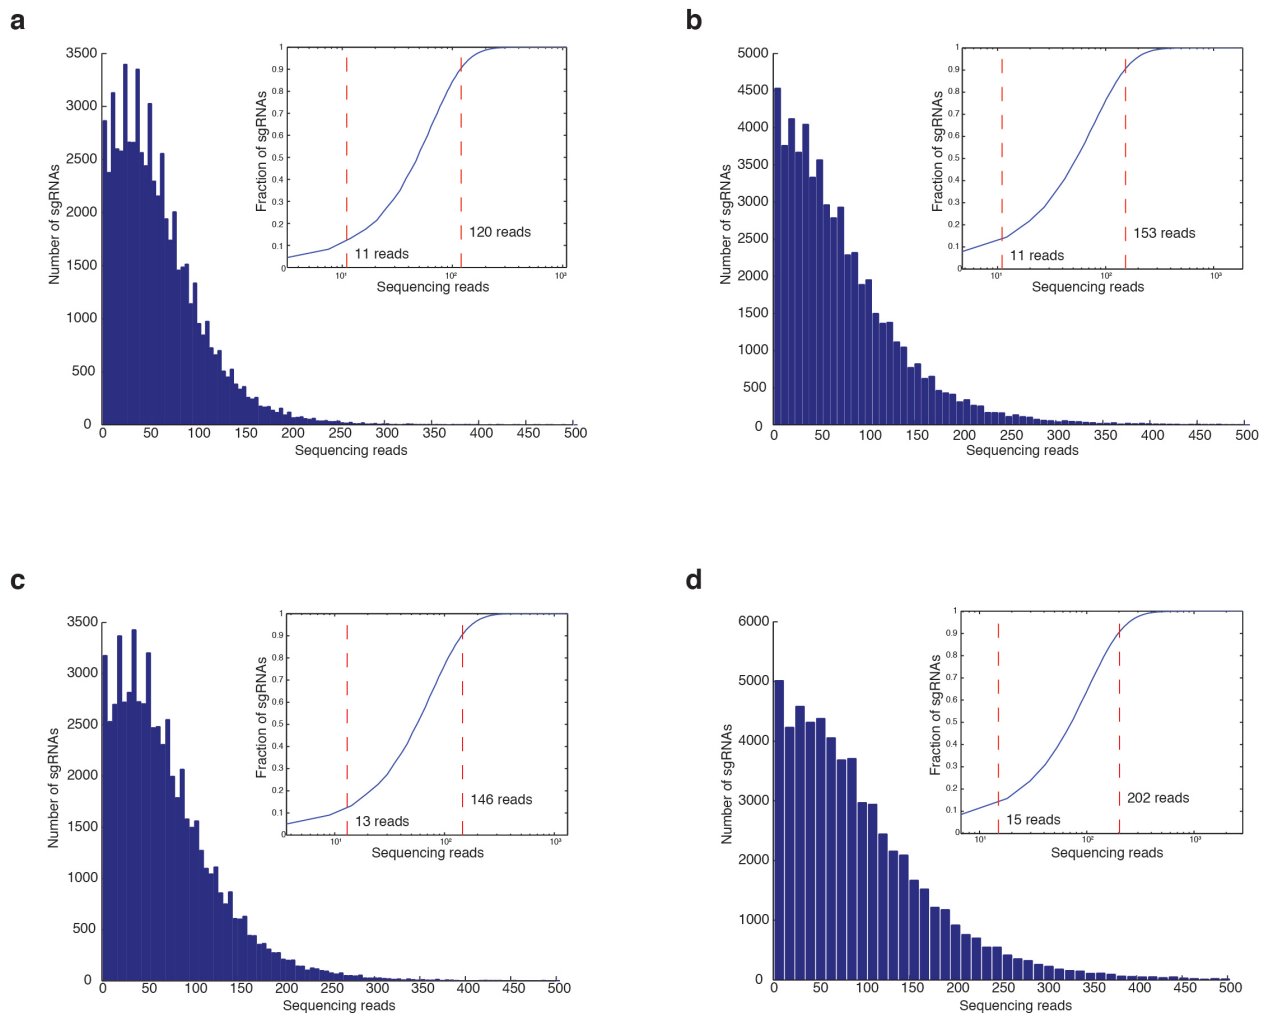

Histograms of sgRNA representation after cloning each half-library into sgRNA vectors. Inset: Cumulative distribution of sequencing reads. The number of sequencing reads for the 10<sup>th</sup> and 90<sup>th</sup> sgRNA percentile is indicated by the dashed red lines and text labels. All library sequencing was performed with PCR replicates; only one replicate is shown for each half-library. **(a,b)** Mouse GeCKOv2 library A **(a)** and library B **(b)** in lentiCRISPRv2. **(c,d)** Mouse GeCKOv2 library A **(c)** and B **(d)** in lentiGuide-Puro.

## Supplementary Methods

**Lentiviral cloning and production.** For determination of lentiCRISPR v1, lentiCRISPR v2, and lentiGuide-Puro viral titers, the following sgRNA targeting EGFP (with no known targets in the human genome) was cloned into all 3 lentiviral transfer vectors:

EGFP sgRNA            GGGCGAGGAGCTGTTCACCG

To clone the sgRNA guide sequence, plasmids were cut and dephosphorylated with FastDigest BsmBI and FastAP (Fermentas) at 37 °C for 2 hours. Oligonucleotides for the EGFP sgRNA guide sequence (Integrated DNA Technologies) were phosphorylated using polynucleotide kinase (Fermentas) at 37 °C for 30 minutes and then annealed by heating to 95 °C for 5 minutes and cooling to 25 °C at 1.5 °C/minute. Using T7 ligase (Enzymatics), annealed oligos were ligated into gel purified vectors (Qiagen) at 25 °C for 5 minutes. Cloned transfer plasmids were amplified using a endotoxin-free midi-prep kit (Qiagen).

To make lentivirus, the transfer plasmids were co-transfected with packaging plasmids pMD2.G and psPAX2 (Addgene plasmids 12259 and 12260), as described previously<sup>1</sup>. Briefly, for each virus, a T-75 flask of 80 % confluent HEK293T cells (ATCC CRL-3216) was transfected in OptiMEM (Life Technologies) using 10 ug of the transfer plasmid, 5 ug pMD2.G, 7.5 ug psPAX2, 100 ul of Plus Reagent (Life Technologies), and 50 ul of Lipofectamine 2000 (Life Technologies). After 6 hours, media was changed to D10 media, DMEM (Life Technologies) with 10 % fetal bovine serum (Hyclone), with 1 % bovine serum albumin (Sigma) added to improve virus stability. After 60 hours, viral supernatants were harvested and centrifuged at 3,000 rpm at 4 °C for 10 min to pellet cell debris. The supernatant was filtered through a 0.45 um low protein binding membrane (Millipore) and used immediately.

**Lentiviral functional titration.** Lentiviruses were titered in a functional assay by measuring puromycin resistance after transduction. All lentiviruses were produced in triplicate transfections. Relative titer measurements from separate viral production transfections performed weeks apart resulted in similar relative titers.

For each viral construct,  $2.5 \times 10^4$  HEK293T-EGFP cells were transduced in suspension (i.e. during plating) with 10, 100, or 1000  $\mu$ l of viral supernatant in wells of a 24-well plate. For lentiGuide-Puro transduction the HEK293T-EGFP cells also had a genomically-integrated copy of Cas9 from previous transduction with lentiCas9-Blast. Each transduction condition (construct and virus volume) was performed in triplicate. In each well, D10 culture media was added to make the final volume 1.5 ml. Cell without any virus added were also plated in six wells (3 wells for puromycin treatment, 3 wells as control).

At 24 hours post-transduction, media was changed to D10 with 1  $\mu$ g/ml puromycin (Sigma) for all wells except the uninfected controls without puromycin. At 3 days post-transduction, cells in all wells were split 1:5 to prevent any well from reaching confluence. Except for the uninfected controls without puromycin, new D10 media was supplemented with 1  $\mu$ g/ $\mu$ l puromycin. At 5 days post-transduction, all cells in the uninfected control wells treated with puromycin were floating/dead, which was verified using Trypan Blue exclusion (Sigma).

For the remaining wells, adherent cells were present and cell viability was measured using CellTiter Glo (Promega) following the manufacturer's protocol. After allowing cells to reach room temperature, media was aspirated from the cells and CellTiter Glo (diluted 1:1 in phosphate-buffered saline) was added. Plates were covered with foil, placed on an orbital shaker for 2 min, and then incubated for 10 minutes at room temperature. Luminescence was measured on an Synergy H4 plate imager (Biotek) using a 1 second integration time and auto-gain to utilize the full dynamic range of the detector. Positive controls (untransduced cells without puromycin) and negative controls (empty wells) were included in the assay.

Fold differences in titer between viral constructs were calculated using luminescence values. Specifically, comparisons were made between pairs of viruses for the same volume of supernatant. Only viral volumes for which cell survival was greater than 1% and less than 20 % of control (untransduced) cells were directly compared. Assuming Poisson statistics, 20 % cell survival implies that approximately 90 % of cells surviving puromycin selection were infected by only a single virus.

Flow cytometry data was collected from the same set of infections using a BD Accuri C6 flow cytometer. Using FlowJo (TreeStar), single cells were distinguished from debris and doublets by gating in forward and side scatter area plots. EGFP fluorescence was measured in the gated

population from transduced and uninfected HEK293T-EGFP cells. For transductions with lentiGuide-Puro, HEK293T-EGFP cells had been transduced with lentiCas9-Blast and selected for 6 days with 5 ug/ml blasticidin (Life Technologies). For all antibiotic selections (puromycin and blasticidin), uninfected control cells were also exposed to the same concentration and duration of antibiotic selection to verify complete elimination of untransduced cells.

**Design of GeCKOv2 libraries.** Genome-wide sgRNA libraries for the human and mouse genomes were designed using the following steps:

- (1) *Identification of constitutive exons:* For the human library, RNA sequencing data from the Illumina Human Body Map 2.0 (GEO accession number: GSE30611) was mapped to the reference human genome (hg19) using TopHat v1.0.14<sup>2</sup> and transcripts were reconstructed with Cufflinks v1.0.2<sup>3</sup>, as previously described<sup>4</sup>. Exons expressed in all tissues in the Human Body Map dataset were termed constitutive and chosen for sgRNA targeting. For the mouse library, we selected exons that are included in all of the NCBI RefSeq (<http://www.ncbi.nlm.nih.gov/refseq/>) transcripts for the same gene.

In both species, for each gene, we excluded the first and last exons and any exon that contained an alternative splicing site. Using these procedures, we chose 4 constitutive exons for each gene. For genes where there were less than 4 constitutive exons, we added exons starting from the second coding exon towards the end of the gene. The coding boundaries for each exon were identified using the NCBI Consensus CoDing Sequence (CCDS) database (<http://www.ncbi.nlm.nih.gov/CCDS/CcdsBrowse.cgi>).

- (2) *Choice of sgRNA sequences:* For each gene, all *S. pyogenes* Cas9 sgRNA sequences of the form (N)<sub>20</sub>NGG in all constitutive exons (from the procedure in (1) above) were selected as candidate targets. Each 20mer candidate target sgRNA was mapped to a precompiled index containing all 20mer sequences in the human genome followed by either NGG or NAG. This mapping was done using the Bowtie short read aligner<sup>5</sup>, allowing up to 3 base mismatches (with parameters `-a --best -v 3`). For each potential off-target identified by the mapping, the following score was calculated<sup>6</sup>:

$$S_{\text{off-target}} = \prod_{e \in \mathcal{M}} (1 - W[e]) \times \frac{1}{\left(\frac{(19-\bar{d})}{19} \times 4 + 1\right)} \times \frac{1}{n_{mm}^2}$$

Within the first term,  $M$  is the set of mismatches between the potential off-target and the candidate target sgRNA. For each mismatch in  $M$ ,  $e$  denotes the position of the mismatch relative to the protospacer-adjacent motif (PAM). The values of  $e$  range between 1 (for the most PAM-distal base in the sgRNA) to 20 (for the most PAM-proximal base in the sgRNA). Using  $e$  as the index, a value from the look-up table  $W$  denotes the empirically-determined weight (relative to the other terms in the  $S_{\text{off-target}}$  metric) that penalizes mismatches based on their position in the sgRNA sequence<sup>6</sup>:

|        |       |      |       |       |       |       |       |       |       |       |
|--------|-------|------|-------|-------|-------|-------|-------|-------|-------|-------|
| $e$    | 1     | 2    | 3     | 4     | 5     | 6     | 7     | 8     | 9     | 10    |
| $W[e]$ | 0     | 0    | 0.014 | 0     | 0     | 0.395 | 0.317 | 0     | 0.389 | 0.079 |
| $e$    | 11    | 12   | 13    | 14    | 15    | 16    | 17    | 18    | 19    | 20    |
| $W[e]$ | 0.445 | .508 | 0.613 | 0.851 | 0.732 | 0.828 | 0.615 | 0.804 | 0.685 | 0.583 |

$\bar{d}$  is the mean pairwise distance between all pairs of elements in  $M$  and  $n_{mm}$  is the number of elements in  $M$ .

Each of the individual off-targets ( $S_{\text{off-target}}$ ) for one candidate target sgRNA were integrated into an aggregate off-target score as follows:

$$S_{\text{guide}} = \frac{100}{1 + \sum_{i=1}^n S_{\text{off-target}}(i)}$$

$S_{\text{off-target}}$  is the score for a single potential off-target and  $S_{\text{guide}}$  is a score (0-100 scale) that provides a rating of how well a candidate sgRNA uniquely targets within the genome.

Candidate sgRNAs with higher values of  $S_{\text{guide}}$  are predicted to have less off-target activity.

For each gene, we chose 6 sgRNAs with the highest values of  $S_{\text{guide}}$  across all 4 constitutive exons (from step (1)) subject to constraint that no more than 2 sgRNAs could target a single exon. This procedure resulted in extremely uniform coverage of genes: For 99.4% of genes in the GeCKOv2 human library and 99.8% of genes in the GeCKOv2 mouse library, each gene was targeted with exactly 6 sgRNAs.

(3) *Targeting of mature miRNAs*: For the design of miRNA targeting guides, we used the pre-miRNA sequence coordinates from the mirBASE database ([www.mirbase.org](http://www.mirbase.org))<sup>7</sup>. For each pre-miRNA, we listed all the possible (N)<sub>20</sub>NGG sequences. In total, we chose up to 4 sgRNAs per miRNA or less if there were not 4 sgRNAs present in the pre-miRNA sequence.

**GeCKO library pooled synthesis and cloning.** DNA oligonucleotide library synthesis was completed on a programmable microarray using a B3 Synthesizer (CustomArray) and SAFC Proligo reagents (Sigma), as recommended by the manufacturer. The synthesis products were cleaved from the microarray and deprotected by overnight incubation in 28-30% ammonium hydroxide at 65 °C, dried, resuspended in 30 ul TE buffer and then purified using a QIAquick spin column (Qiagen). Full-length oligonucleotides (74 nt) were amplified by PCR using Phusion HS Flex (NEB). For the PCR reaction, the manufacturer's protocol was followed using 0.1 ul of synthesized oligonucleotide template, primers Array F and ArrayR (see below), an annealing temperature of 63 °C, an extension time of 15 s, and 20 cycles. After PCR, the 140 bp amplicon was size-selected using a 2% agarose E-Gel EX (Life Technologies, Qiagen).

ArrayF        TAACTTGAAAGTATTTTCGATTTCTTGGCTTTATATATCTTGTGGAAAGGAC  
                  GAAACACCG

ArrayR        ACTTTTTCAAGTTGATAACGGACTAGCCTTATTTTAACTTGCTATTTCT  
                  AGCTCTAAAAC

The vector backbone (lentiCRISPR v2 or lentiGuide-Puro) was digested with BsmBI (Fermentas) and treated with FastAP (Fermentas) at 37°C for 2 hours and gel-purified on a 1 % E-Gel EX (Life Technologies, Qiagen). A 20 ul Gibson ligation reaction (NEB) was performed using 10 ng of the gel-purified inserts and 25 ng of the vector (for lentiCRISPR v2) and using 5 ng of the gel-purified inserts and 25 ng of the vector (for lentiGuide-Puro). From the ligation, 0.5 ul of the reaction was transformed into 25 ul of electrocompetent cells (Lucigen) according to the manufacturer's protocol using a GenePulser (BioRad). To ensure no loss of representation, sufficient parallel transformations were performed using the same ligation reaction and plated onto 245 mm x 245 mm plates (Corning) with carbenicillin selection (50 ug/ml), which yielded

30-200 X library coverage. Colonies were scraped off plates and combined before plasmid DNA extraction using Endotoxin-Free Plasmid Maxiprep (Qiagen).

**Library sequencing and validation.** To check library representation, synthesis fidelity, and bias, libraries were amplified and then deep sequenced. First, libraries were PCR amplified for 16 cycles using Phusion Flash High-Fidelity (Thermo) with primers to add adaptors for Illumina sequencing. For all libraries, PCR reactions were performed in duplicate and barcoded to allow quantification of bias introduced by PCR. Samples were sequenced on a MiSeq following the manufacturer's protocol using a v3 150 cycle kit with 10% PhiX (Illumina).

PCR replicates were demultiplexed using FASTX-Toolkit (Hannon Lab, CSHL) and adaptors were trimmed using cutadapt to leave only the sgRNA guide sequence<sup>8</sup>. Alignment of the guide sequence to the appropriate GeCKO library index was done using Bowtie with parameters to tolerate up to a single nucleotide mismatch<sup>5</sup>. The Bowtie alignment was then read into Matlab for further analysis (Mathworks). For all libraries, greater than 90 % of sgRNAs were represented with at least one sequencing read and the difference in representation between the 90<sup>th</sup> and 10<sup>th</sup> percentile sgRNAs was always less than 15-fold. Histograms of sgRNA distributions and cumulative sgRNA read counts for libraries in both lentiCRISPRv2 and lentiGuide-Puro are shown in Supplementary Figure 2 (human) and Supplementary Figure 3 (mouse).

**Vector maps, library sequences and reagent distribution.** All lentiCRISPR plasmids and GeCKO libraries are available on Addgene. Please see <http://genome-engineering.org/gecko/> for downloadable vector maps. See labeled sequences in Supplementary Data for more details.

The sgRNAs in the human and mouse v2 GeCKO libraries are available for download on the GeCKO website or from Addgene.



## Supplementary Data

### LentiCRISPR v2

|                |                                                                                                    |
|----------------|----------------------------------------------------------------------------------------------------|
| <b>Pink</b>    | BsmBI TypeIIIs sites for cloning in 20bp sgRNA guide sequence after removing 1.8kb spacer sequence |
| <b>Green</b>   | +85 chrRNA sequence for sgRNA                                                                      |
| <b>Gray</b>    | EFS promoter sequence                                                                              |
| <b>Yellow</b>  | Human codon-optimized SpCas9 coding sequence                                                       |
| <i>Italics</i> | FLAG peptide tag                                                                                   |
| <b>Red</b>     | P2A bicistronic linker/self-cleaving peptide                                                       |
| <b>Blue</b>    | Puromycin resistance coding sequence                                                               |

GTCGACGGATCGGGAGATCTCCCGATCCCCTATGGTGCACCTCTCAGTACAATCTGCTCTGATGCCGCATAGTTAAGC  
CAGTATCTGCTCCCTGCTTGTGTGTTGGAGGTCGCTGAGTAGTGCGCGAGCAAAATTTAAGCTACAACAAGGCAAGG  
CTTGACCGACAATTGCATGAAGAATCTGCTTAGGGTTAGGCGTTTTGCGCTGCTTCGCGATGTACGGGCCAGATATA  
CGCGTTGACATTGATTATTGACTAGTTATTAATAGTAATCAATTACGGGGTCATTAGTTTCATAGCCCATATATGGAG  
TTCCGCGTTACATAACTTACGGTAAATGGCCCCGCTGGCTGACCGCCCAACGACCCCCGCCATTGACGTCAATAAT  
GACGTATGTTCCCATAGTAACGCCAATAGGGACTTTCCATTGACGTCAATGGGTGGAGTATTTACGGTAAACTGCC  
ACTTGGCAGTACATCAAGTGTATCATATGCCAAGTACGCCCCCTATTGACGTCAATGACGGTAAATGGCCCGCTGG  
CATTATGCCCAGTACATGACCTTATGGGACTTTCTACTTGGCAGTACATCTACGTATTAGTCATCGCTATTACCAT  
GGTGATGCGGTTTTGGCAGTACATCAATGGGCGTGGATAGCGGTTTGACTCACGGGGATTTCCAAGTCTCCACCCCA  
TTGACGTCAATGGGAGTTTGTGGCACAAAATCAACGGGACTTTCCAATAATGTCGTAACAACCTCCGCCCATTTG  
ACGCAAATGGGCGGTAGGCGTGTACGGTGGGAGGTCTATATAAGCAGCGCGTTTTGCCTGTACTGGGTCTCTCTGGT  
TAGACCAGATCTGAGCCTGGGAGCTCTCTGGCTAACTAGGGAACCCACTGCTTAAGCCTCAATAAAGCTTGCCTTGA  
GTGCTTCAAGTAGTGTGTGCCCGTCTGTTGTGTGACTCTGGTAACTAGAGATCCCTCAGACCCTTTTAGTCAGTGTG  
GAAAATCTCTAGCAGTGGCGCCCGAACAGGGACTTGAAGCGAAAGGGAAACCCAGAGGAGCTCTCTCGACGCAGGAC  
TCGGCTTGTGAAGCGCACGGCAAGAGGCGAGGGCGGCGACTGGTGGTACGCCAAAAATTTGACTAGCGGGAG  
GCTAGAAGGAGAGAGATGGGTGCGAGAGCGTCAGTATTAAGCGGGGGAGAATTAGATCGCGATGGGAAAAAATTCGG  
TTAAGGCCAGGGGAAAGAAAAAATATAAATTAATAACATATAGTATGGGCAAGCAGGGAGCTAGAACGATTTCGAGT  
TAATCCTGGCCTGTTAGAAACATCAGAAGGCTGTAGACAAATACTGGGACAGCTACAACCATCCCTTCAGACAGGAT  
CAGAAGAATTTAGATCATTATATAATACAGTAGCAACCCTCTATTGTGTGCATCAAAGGATAGAGATAAAAGACACC  
AAGGAAGCTTTAGACAAGATAGAGGAAGAGCAAAACAAAAGTAAGACCACCGCACAGCAAGCGGCCGCTGATCTTCA  
GACCTGGAGGAGGAGATATGAGGGACAATTGGAGAAGTGAATTATATAAATATAAAGTAGTAAAAATTGAACCATTA  
GGAGTAGCACCCACCAAGGCAAAGAGAAGAGTGGTGCAGAGAGAAAAAAGAGCAGTGGGAATAGGAGCTTTGTTCTT  
TGGGTTCTTGGGAGCAGCAGGAAGCACTATGGGCGCAGCGTCAATGACGCTGACGGTACAGGCCAGACAATTATTGT  
CTGGTATAGTGCAGCAGCAGAACAATTTGCTGAGGGCTATTGAGGCGCAACAGCATCTGTTGCAACTCACAGTCTGG  
GGCATCAAGCAGCTCCAGGCAAGAATCCTGGCTGTGGAAAGATACCTAAAGGATCAACAGCTCCTGGGGATTTGGGG  
TTGCTCTGGAAAACCTATTTGCACCACTGCTGTGCCTTGGAAATGCTAGTTGGAGTAATAAATCTCTGGAACAGATTT  
GGAATCACACGACCTGGATGGAGTGGGACAGAGAAATTAACAATTACACAAGCTTAATACACTCCTTAATTGAAGAA  
TCGCAAAACCAGCAAGAAAAGAATGAACAAGAATTATTGGAATTAGATAAATGGGCAAGTTTTGTGGAATTGGTTTAA  
CATAACAAATTTGGCTGTGGTATATAAATTTATTCATAATGATAGTAGGAGGCTTGGTAGGTTAAGAATAGTTTTTG  
CTGTACTTTCTATAGTGAATAGAGTTAGGCAGGGATATTCACCATTATCGTTTTAGACCCACCTCCCAACCCCGAGG  
GGACCCGACAGGCCCGAAGGAATAGAAGAAGAAGGTGGAGAGAGAGACAGAGACAGATCCATTCGATTAGTGAACGG  
ATCGGCACTGCGTGCGCCAATTTCTGCAGACAAATGGCAGTATTCATCCACAATTTTAAAAGAAAAGGGGGATTGGG  
GGGTACAGTGCAGGGGAAAGAATAGTAGACATAATAGCAACAGACATACAAACTAAAGAATTACAAAAACAAATTAC  
AAAAATTCAAAATTTTCGGGTTTATTACAGGGACAGCAGAGATCCAGTTTGGTTAATTAAGGTACCGAGGGCCTATT  
TCCCATGATTCCTTCATATTTGCATATACGATACAAGGCTGTTAGAGAGATAATTAGAATTAATTTGACTGTAAACA  
CAAAGATATTAGTACAAAATACGTGACGTAGAAAGTAATAATTTCTTGGGTAGTTTGCAGTTTTAAAATTTATGTTTT  
AAAATGGACTATCATATGCTTACCCTAATTTGAAAGTATTTTCGATTTCTTGGCTTTATATATCTTGTGGAAAGGACG  
AAACACCGGAGACGTTTGTAAATGAGCACACAAAATACACATGCTAAAATATTATATTCTATGACCTTTATAAAATC  
AACCAAAATCTTCTTTTAAATAACTTTAGTATCAATAATTAGAATTTTTATGTTCTTTTTGCAAACTTTTAAATAAA  
AATGAGCAAAATAAAAAACGCTAGTTTTAGTAACTCGCGTTGTTTTCTTACCTTTAATAATAGCTACTCCACCAC  
TTGTTCTTAAGCGGTACAGCTCCTGCTTCAATCAATTTTTGAGCATCTTCAAATGTTCTAACTCCACCAGCTGCTTTA  
ACTAAAGCATTGTCTTTAACAACCTGACTTCATTAGTTTAAACATCTTCAAATGTTGCACCTGATTTTAAAAATCCTGT

TGATGTTTTAACAAATTCTAATCCAGCTTCAACAGCTATTTCCACAAGCTTTTCATGATTTCTTCTTTTGTTAATAAAC  
AATTTTCCATAATACATTTAACACATGTGATCCAGCTGCTTTTTTACAGCTTTTCATGTCTTCTAAAACATAATTCA  
TAATTTTTGTCTTTAATGCACCAATATTTAATACCATATCAATTTCTGTTGCACCATCTTTAATTGCTTCAGAAAC  
TTCGAATGCTTTTGTAGCTGTTGTGCATGCACCTAGAGGAAAACCTACAACATTTGTTATTCTACATTTGTGCCTT  
TTAATAATTTCTTACAATAGCTTGTTCATATGAATTAACACAACTGTTGCAAAATCAAATTCATTTGCTTCATCA  
CATAATTGTTAATTTAGCTTTTCGTAGCATCTTGTTTAATAATGTGTGATCTATATATTTGTTTAGTTTCATTTT  
TTCTCCTATATATTCATTTTTAATTTAATTTCTTTAATAATTTTCGTCTACTTTAACTTTAGCGTTTTGAACAGATTC  
ACCAACACCTATAAAATAAATTTTTAGTTTAGGTTCCAGTTCCACTTGGGCGAACAGCAAATCATGACTTATCTTCTA  
AATAAAATTTAGTAAGTCTTGTCTGGCATATTATACATTTCCATCGATGTAGTCTTCAACATTTAAACAATTTAAGT  
CCAGCAATTTGAGTTAAGGGTGTCTCTCAATGATTTTCAATGTTTCAATTTTTAATTTCTTTCTTCTTGTGTTT  
AAAATTTCAAGTTTAAAGTGAAGTGAATATGCACCCATTTCTTTAAATAAATCTTCTAAATAGTCTACTAATGTTT  
TATTTTGTTTTTTATAAAATCAAGCAGCCTCTGCTATTAATATAGAAGCTTGTATTCCATCTTTATCTCTAGCTGAG  
TCATCAATTACATATCCATAACTTTCTTATAAGCAAAAACAAAATTTAATCCGTTATCTTCTTCTTTAGCAATTTT  
TCTACCCATTCATTTAAATCCAGTTAAAGTTTTTACAATATTAACTCCATATTTTTTCATGAGCGATTCTATCACCCA  
AATCACTTGTACAAAACCTGAATATAGAGCCGGATTTTTTGAATGCTATTTAAGCGTTTTAGATTTGATAATTTT  
CAATCAATTAATTTGGTCTGTTTGAATTTCCATCTAATCTTACAAAATGACCATCATGTTTTATTGCCATTCCAAA  
TCTGTCAGCATCTGGGTCATTCATAATAATAATATCTGCATCATGTTTAAATACCATATTTCAAGCGGTATTTTTTCATG  
CAGGATCAAATTTCTGGATTTGGATTTACAACATTTTTAATGTTTCAATGCTCTTCAACCTCAATA  
ACGTTATATCCTGATTCACGTAATTTTTGGGGTAAATTTAGTTTCTGTTCCATTAACCTGCGCTAAAAATAATTTT  
TAAATCTTTTTTAGCTTCTTGTCTTTTTTGTACGCTCTGTTTAGAGCTAGAAAATAGCAAGTTAAAATAAGGCTA  
GTCCGTTATCAACTTGAAAAAGTGGCACCGAGTCGGTGTCTTTTTGAATTCGCTAGCTAGGCTTGAAGGAGTGGG  
AATTGGCTCCGGTGCCTGTCAGTGGGCAGAGCGCACATCGCCACAGTCCCGGAGAAGTTGGGGGGAGGGGTCCGGCA  
ATTGATCCGGTGCCTAGAGAAGGTGGCGCGGGTAAACTGGGAAAGTGAATGTCGTGACTGGCTCCGCCTTTTTCCC  
GAGGGTGGGGGAGAACCGTATATAAGTGCAGTAGTCGCCGTGAACGTTCTTTTTCGCAACGGGTTTGGCCGAGAAC  
ACAGGACCGGTTCTAGAGCGCTGCCACCATGGACAAGAAGTACAGCATCGGCCTGGACATCGGCACCAACTCTGTGG  
GCTGGGCGGTGATCCCGCAGGTACAAGTGCACAGGAGTCCAGCAAGAATCAAGGTGCTGGGCAACCCGACCCGGCACAG  
ATCAAGAAGAACCTGATCGGACCCCTGCTGTTTCGACAGCGGCAACAGCCGAGGCCACCCGGCTGAAGAGAACCGC  
CAGAAGAAGATACACCAGACGGAAGAACCGGATCTGCTATCTGCAAGAGATCTTCAGCAACGAGATGGCCAAGGTGG  
ACGACAGCTTCTTCCACAGACTGGAAGAGTCTTCTGTTGGAAGAGGATAAGAAGCACGAGCGGCACCCCATCTTC  
GGCAACATCGTGGACGAGGTGGCTACCACGAGAAGTACCCACCATCTACCACCTGAGAAAGAAACTGGTGGACAG  
CACCGACAAGGCCGACCTGCGGCTGATCTATCTGGCCCTGGCCACATGATCAAGTTCGGGGCCACTTCTGATCG  
AGGGCGACCTGAACCCGACAACAGCGACGTGGACAAGCTGTTTCCAGCTGGTGCAGACCTACAACCAGCTGTTT  
GAGGAAAACCCCATCAACGCCAGCGGCGTGGACGCCAAGGCCATCTGTCTGCCAGACTGAGCAAGAGCAGACGGCT  
GGAAAATCTGATCGCCAGCTGCCCGGCGAGAAGAAGTGGCCTGTTTCGAAACCTGATTGCCCTGAGCCTGGGCC  
TGACCCCAACTTCAAGAGCAACTTCGACCTGGCCGAGGATGCCAACTGCAGCTGAGCAAGGACACCTACGACGAC  
GACCTGGACAACCTGCTGGCCAGATCGGCGACCAAGTACGCCGACCTGTTTCTGGCCGCAAGAACCTGTCCGACGC  
CATCCTGCTGAGCGACATCTGAGAGTGAACACCGAGATACCAAGGCCCCCTGAGCGCCTCTATGATCAAGAGAT  
ACGACGAGCACACCAGGACCTGACCCCTGCTGAAAGCTCTCGTGCAGGAGCAGCTGCCTGAGAAGTACAAAGAGATT  
TTCTTCGACCAGAGCAAGAACGGCTACGCCGGCTACATTGACGGCGGAGCCAGCCAGGAAGAGTTCTACAAGTTCAT  
CAAGCCCATCTGGAAAAGATGGACGGCACCGAGGAAGTCTCGTGAAGCTGAACAGAGAGGACCTGCTGCGGAAGC  
AGCGGACCTTCGACAACCGCAGCATCCCCACAGATCCACCTGGGAGAGCTGCACGCCATTTCTGCGGCGGACAGGAA  
GATTTTTACCCATTTCTGAAGGACAACCGGAAAAGATCGAGAAGATCTGACCTTCCGCATCCCCCTACTACGTGGG  
CCCTCTGGCCAGGGAAAACAGCAGATTCGCTGGATGACCAGAAAGAGCGAGGAAACCATCACCCCTGGAACCTTCG  
AGGAAGTGGTGGACAAGGGCGCTTCCGCCAGAGCTTATCGAGCGGATGACCAACTTCGATAAGAACCTGCCAAC  
GAGAAGGTGCTGCCAAGCACAGCCTGCTGTACGAGTACTTACCCTGTATAACGAGCTGACCAAAGTGAATACGT  
GACCGAGGGAATGAGAAAGCCCGCCTTCTGAGCGGCGAGCAGAAAAGGCCATCGTGGACCTGCTGTTCAAGACCA  
ACCGGAAAGTGAACGAGCTGAAAGAGGACTACTTCAAGAAAATCGAGTCTTCCGACTCCGTGGAAAATCTCC  
GGCGTGAAGATCGGTTCAACGCCTCCCTGGGCACATACCACGATCTGCTGAAAATTTCAAGGACAAGGACTTCT  
GGACAATGAGGAAAACGAGGACATTTGGAAGATATCGTGTGACCCCTGACACTGTTTGGAGACAGAGAGATGATCG  
AGGAACGGCTGAAAACCTATGCCACCTGTTTCGACGACAAAGTGAAGCAGCTGAAGCGGCGGAGATACACCGGC  
TGGGGCAGGCTGAGCCGGAAGCTGATCAACGGCATCCGGGACAAGCAGTCCGGCAAGACAATCTGGATTTCTGAA  
GTCCGACGGCTTCGCCAACAGAAAATTCATGCAGCTGATCCACGACGACAGCCTGACCTTTAAAGAGGACATCCAGA  
AAGCCCAGGTGTCCGGCCAGGGCGATAGCCTGCACGAGCACATTGCCAATCTGGCCGGCAGCCCCGCCATTAAGAAG  
GGCATCCTGCAGACAGTGAAGGTGGTGGACGAGCTCGTGAAGTGAATGGGCGGCAAGCCCGAGAACATCGTGTAT  
CGAAATGGCCAGAGAGAACCAGACCACCCAGAAGGGACAGAAGAAGCAGCCGCGAGAGAATGAAGCGGATCGAAGAGG  
GCATCAAAGAGCTGGGCAGCCAGATCCTGAAAGAACACCCCGTGGAAAACACCCAGCTGCAGAACGAGAAGCTGTAC  
CTGTACTACCTGCAGAATGGGCGGGATATGTACGTGGACCAGGAAGTGGACATCAACCGGCTGTCCGACTACGATGT

GGACCATATCGTGCCTCAGAGCTTTCTGAAGGACGACTCCATCGACAACAAGGTGCTGACCAGAAGCGACAAGAACC  
GGGGCAAGAGCGACAACGTGCCCTCCGAAGAGGTCGTGAAGAAGATGAAGAATACTGGCGGCAGCTGCTGAACGCC  
AAGCTGATTACCCAGAGAAAGTTTCGACAATCTGACCAAGGCCGAGAGAGGGCGCCTGAGCGAACTGGATAAAGGCCGG  
CTTCATCAAGAGACAGCTGGTGGAAACCCGGCAGATCACAAGACAGTGGCACAGATCCTGGACTCCCGGATGAACA  
CTAAGTACGACGAGAATGACAAGCTGATCCGGGAAGTGAAAGTGATCACCTGAAGTCCAAGCTGGTGTCCGATTTT  
CGGAAGGATTTCCAGTTTTACAAAGTGCGCGAGATCAACAATACTACCACCACGCCACGACGCCTACCTGAACGCCGT  
CGTGGGAACCGCCCTGATCAAAAAGTACCCTAAGCTGGAAAGCGAGTTCGTGTACGGCGACTACAAGGTGTACGACG  
TGCGGAAGATGATCGCCAAGAGCGAGCAGGAAATCGGCAAGGCTACCGCCAAGTACTTCTTCTACAGCAACATCATG  
AACTTTTTCAAGACCGAGATTACCCTGGCCAACCGCGAGATCCGGAAGGCTACCGCAAGTACTTCTTCTACAGCAACATCATG  
CGGGGAGATCGTGTGGGATAAGGGCCGGGATTTTCCACCTGCGGAAAGTGCTGAGCATGCCCAAGTGAATATCG  
TGAAAAAGACCGAGGTGCAGACAGGCGGCTTCAGCAAAGAGTCTATCCTGCCAAGAGGAACAGCGATAAGCTGATC  
GCCAGAAAAGAAGGACTGGGACCCTAAGAAGTACGGCGGCTTCGACAGCCCCACCGTGGCCTATTCTGTGCTGGTGGT  
GGCCAAAGTGAAAAAGGGCAAGTCCAAGAACTGAAGAGTGTGAAAGAGCTGCTGGGGATCACCATCATGGAAAGAA  
GCAGCTTCGAGAAGAATCCCATCGACTTTCTGGAAGCCAAGGGCTACAAAGAAGTGAAAAAGGACCTGATCATCAAG  
CTGCCTAAGTACTCCCTGTTTCGAGCTGGAAAACGGCCGGAAGAGAATGCTGGCCTCTGCCGGCGAACTGCAGAAGGG  
AAACGAACTGGCCCTGCCCTCCAAATATGTGAACCTTCTGTACCTGGCCAGCCACTATGAGAAGCTGAAGGGCTCCC  
CCGAGGATAATGAGCAGAAACAGCTGTTTGTGGAACAGCACAAGCACTACCTGGACGAGATCATCGAGCAGATCAGC  
GAGTTCTCCAAGAGAGTATCCTGGCCGACGCTAATCTGGACAAAGTGCTGTCCGCCTACAACAAGCACCGGGATAA  
GCCCATCAGAGAGCAGGCCGAGAATATCATCCACCTGTTTACCCTGACCAATCTGGGAGCCCCTGCCGCCTTCAAGT  
ACTTTGACACCACCATCGACCAGGAAGAGGTACACCAGCACCAAGAGGTTGCTGGACGCCACCCTGATCCACCAGAGC  
ATCACCGGCCTGTACGAGACACGGATCGACCTGTCTCAGCTGGGAGGCGACAAGCGACCTGCCGCCACAAAGAAGGC  
TGGACAGGCTAAGAAGAAGAAA *GATTACAAAGACGATGACGATAAGGGATCCGGCGCAACAACCTTCTCTCTGCTGA*  
*AACAAGCCGGAGATGTGGAAGAGAATCCTGGACCG* ACCGAGTACAAGCCCACGGTGCGCCTCGCCACCCGCGACGAC  
GTCCCCAGGGCCGTACGCACCCTCGCCGCCGCTTCGCCGACTACCCCGCCACGCGCCACACCGTCGATCCGGACCG  
CCACATCGAGCGGGTCACCGAGCTGCAAGAATCTTCTCACGCGCTCGGGCTCGACATCGGCAAGGTGTGGTTCG  
CGGACGACGGCGCGGTCGGTCTGGACCACGGGAGAGCGTGAAGCGGGGGCGGTGTTCCGCCGAGATCGGC  
CCGCGCATGGCCGAGTTGAGCGGTTCCCGCTGGCCGCGCAGCAACAGATGGAAGGCCTCCTGGCGCCACCGGCC  
CAAGGAGCCCGCGTGGTTCCTGGCCACCGTCGGAGTCTCGCCCGACCACAGGGCAAGGGTCTGGGCAGCGCCGTCG  
TGCTCCCCGGAGTGGAGGCGGCCGAGCGCGCGGGGTGCCCGCTTCTGGAGACCTCCGCGCCCGCAACCTCCCC  
TTCTACGAGCGGCTCGGCTTACCCTCACCGCCGACGTCGAGGTGCCCGAAGGACCGCGCACCTGGTGCATGACCCG  
CAAGCCCGGTGCCTGAACGCGTTAAGTCGACAATCAACCTCTGGATTACAAAATTTGTGAAAGATTGACTGGTATTC  
TTAACTATGTTGCTCCTTTTACGCTATGTGGATACGCTGCTTTAATGCCTTTGTATCATGCTATTGCTTCCCGTATG  
GCTTTTCATTTTCTCCTCCTTGTATAAATCCTGGTTGCTGTCTTTTATGAGGAGTTGTGGCCGTTGTGAGGCAACG  
TGGCGTGGTGTGCACTGTGTTTGTGACGCAACCCCACTGGTTGGGGCATTGCCACCACCTGTCAGCTCCTTTCCG  
GGACTTTCGTTTTCCCTCCCTATTGCCACGGCGGAATCATCGCCGCTGCCTTGGCCGCTGCTGGACAGGGGCT  
CGGCTGTTGGGCACTGACAATCCGTGGTGTGTGCGGGAAATCATCGTCCTTTCCTTGGCTGCTCGCCTGTGTTGC  
CACCTGGATTCTGCGCGGGACGTCCTTCTGCTACGTCCTTTCGGCCCTCAATCCAGCGGACCTTCTTCCCGCGGCC  
TGCTGCCGGCTCTGCGGCCTTTCGCGTCTTCGCCCTTCGCCCTCAGACGAGTCGGATCTCCCTTTGGGCCGCTCC  
CCGCGTCGACTTTAAGACCAATGACTTACAAGGCAGCTGTAGATCTTAGCCACTTTTTAAAAGAAAAGGGGGGACTG  
GAAGGGCTAATTCACCTCCAACGAAGACAAGATCTGCTTTTTGCTTGTACTGGGTCTCTCTGGTTAGACCAGATCTG  
AGCTGGGAGCTCTCTGGCTAACTAGGGAACCCACTGCTTAAGCCTCAATAAAGCTTGCCTTGGTGTCTCAAGTAG  
TGTGTGCCGCTCTGTTGTGACTCTGGTAACCTAGAGATCCCTCAGACCTTTTATGTCAGTGTGAAAATCTCTAGC  
AGGGCCCGTTTTAAACCCGCTGATCAGCCTCGACTGTGCCTTCTAGTTGCCAGCCATCTGTTGTTTTGCCCTCCCCG  
TGCTTCTTGGACCTGGAAGGTGCCACTCCCACTGTCTTTCCTAATAAAAATGAGGAAATTGCATCGCATTGTCTG  
AGTAGGTGTCAATTCTATTCTGGGGGTGGGGTGGGGCAGGACAGCAAGGGGGAGGATTGGGAAGACAATAGCAGGCA  
TGCTGGGGATGCGGTGGGCTCTATGGCTTCTGAGGCGGAAAGAACCAGCTGGGGCTCTAGGGGGTATCCCCACGCGC  
CCTGTAGCGGCGCATTAAAGCGCGGCGGGTGTGGTGGTTACGCGCAGCGTGACCGCTACACTTGCAGCGCCCTAGCG  
CCCGCTCCTTTTCGTTTTTCCCTTCTTCTCGCCACGTTTCGCCGCTTTCGCCGTCAGCTCTAAATCGGGGGCT  
CCCTTTAGGGTTCGATTTAGTGTCTTACGGCACCTCGACCCAAAAAATTTGATTAGGGTGATGGTTCACGTAGTG  
GGCCATCGCCCTGATAGACGGTTTTTTCGCCCTTTCGAGTGGAGTCCACGTTCTTTAATAGTGGACTCTTGTTC  
ACTGGAACAACACTCAACCCTATCTCGGTCTATTCTTTTATTATAAGGGATTTTGGCGATTTCCGGCCTATTGGTT  
AAAAAATGAGCTGATTTAACAATAAATTAACGCGAATTAATCTGTGGAATGTGTGTCAGTTAGGGTGTGGAAAGTC  
CCCAGGCTCCCCAGCAGGCAGAAGTATGCAAAGCATGCATCTCAATTAGTCAGCAACCAGGTGTGGAAAGTCCCCAG  
GCTCCCCAGCAGGCAGAAGTATGCAAAGCATGCATCTCAATTAGTCAGCAACCATAGTCCCGCCCTAACTCCGCC  
ATCCCGCCCTAACTCCGCCAGTTCGCCCATCTCCGCCCATGGCTGACTAATTTTTTTTTATTTATGCAGAGGC  
CGAGGCGCCCTCTGCCTCTGAGCTATTCCAGAAGTAGTGAGGAGGCTTTTTTGGAGGCCTAGGCTTTTGA  
TCCCCGGGAGCTTGTATATCCATTTTCGGATCTGATCAGCACGTTGACAATTAATCATCGGCATAGTATATCGGCA

TAGTATAATACGACAAGGTGAGGAACATAACCATGGCCAAGTTGACCAGTGCCGTTCCGGTGCTCACCGCGCGCGAC  
GTCGCCGGAGCGGTTCGAGTTCTGGACCGACCGGCTCGGGTTCTCCCGGACTTCGTGGAGGACGACTTCGCCGGTGT  
GGTCCGGGACGACGTGACCCTGTTTCATCAGCGCGGTCCAGGACCAGGTGGTGCCGGACAACACCCTGGCCTGGGTGT  
GGGTGCGCGGCTGGACGAGCTGTACGCCGAGTGGTCGGAGGTCGTGTCCACGAACCTCCGGGACGCCTCCGGGCCG  
GCCATGACCGAGATCGGCGAGCAGCCGTGGGGGCGGGAGTTCCGCCCTGCGCGACCCGGCCGGCAACTGCGTGCACCT  
CGTGGCCGAGGAGCAGGACTGACACGTGCTACGAGATTTCCGATTCACCGCCGCCTTCTATGAAAGGTTGGGCTTCG  
GAATCGTTTTCCGGGACGCCGGCTGGATGATCCTCCAGCGCGGGGATCTCATGCTGGAGTTCTTCGCCCACCCCAAC  
TTGTTTTATTGCAGCTTATAATGGTTACAAATAAAGCAATAGCATCACAAATTTACAAATAAAGCATTTTTTTCACT  
GCATTTAGTTGTGGTTTTGTCCAAACTCATCAATGTATCTTATCATGTCTGTATACCGTGCACCTCTAGCTAGAGCT  
TGGCGTAATCATGGTCATAGCTGTTTTCTGTGTGAAATTTGTTATCCGCTCACAAATTCACACAACATACGAGCCGGA  
AGCATAAAGTGTAAGCCTGGGGTGCCTAATGAGTGAGCTAACTCACATTAATTGCGTTGCGCTCACTGCCCGCTTT  
CCAGTCGGGAAACCTGTCTGCCAGCTGCATTAATGAATCGGCCAACGCGCGGGGAGAGGCGGTTTGCGTATTGGGC  
GCTCTTCCGCTTCTCGCTCACTGACTCGCTGCGCTCGGTCGTTCCGGCTGCGGCGAGCGGTATCAGCTCACTCAAAG  
GCGGTAATACGGTTATCCACAGAATCAGGGGATAACGCAGGAAAGAACATGTGAGCAAAAGGCCAGCAAAAGGCCAG  
GAACCGTAAAAAGGCCGCGTTGCTGGCGTTTTTCCATAGGCTCCGCCCCCTGACGAGCATCACAAAAATCGACGCT  
CAAGTCAGAGGTGGCGAAACCCGACAGGACTATAAAGATACCAGGCGTTTTCCCTGGAAGCTCCCTCGTGCCTCT  
CCTGTTCCGACCCTGCCGTTACCGGATACCTGTCCGCCTTTCTCCCTTCGGGAAGCGTGGCGCTTTTCTCATAGCTC  
ACGCTGTAGGTATCTCAGTTCGGTGTAGGTCGTTCCGCTCCAAGCTGGGCTGTGTGCACGAACCCCGTTCCAGCCCG  
ACCGCTGCGCCTTATCCGGTAACATCGTCTTGAGTCCAACCCGGTAAGACACGACTTATCGCCACTGGCAGCAGCC  
ACTGGTAACAGGATTAGCAGAGCGAGGTATGTAGGCGGTGCTACAGAGTTCCTTGAAGTGGTGGCCTAACTACGGCTA  
CACTAGAAGAACAGTATTTGGTATCTGCGCTCTGCTGAAGCCAGTTACCTTCGGAAAAAGAGTTGGTAGCTCTTGAT  
CCGGCAAACAAACCACCGCTGGTAGCGGTGGTTTTTTTTGTTTGCAAGCAGCAGATTACGCGCAGAAAAAAGGATCT  
CAAGAAGATCCTTTGATCTTTTTCTACGGGGTCTGACGCTCAGTGGAACGAAAACCTCACGTTAAGGGATTTTGGTCAT  
GAGATTATCAAAAAGGATCTTACCTAGATCCTTTTAAATTAATAAATGAAGTTTTAAATCAATCTAAAGTATATATG  
AGTAAACTTGGTCTGACAGTTACCAATGCTTAATCAGTGAGGCACCTATCTCAGCGATCTGTCTATTTTCGTTTCATCC  
ATAGTTGCCTGACTCCCCGTCGTGTAGATAACTACGATACGGGAGGGCTTACCATCTGGCCCCAGTGCTGCAATGAT  
ACCGCGAGACCCACGCTCACCGGCTCCAGATTTATCAGCAATAAACCAGCCAGCCGGAAGGGCCGAGCGCAGAAGTG  
GTCCTGCAACTTTATCCGCTCCATCCAGTCTATTAATTGTTGCCGGGAAGCTAGAGTAAGTAGTTCGCCAGTTAAT  
AGTTTGCGCAACGTTGTTGCCATTGCTACAGGCATCGTGGTGTACGCTCGTCTGTTGGTATGGCTTCATTCAGCTC  
CGGTTCCCAACGATCAAGGCGAGTTACATGATCCCCATGTTGTGCAAAAAAGCGGTTAGCTCCTTCGGTCTCCGA  
TCGTTGTCAGAAGTAAGTTGGCCGAGTGTATCACTCATGGTTATGGCAGCACTGCATAATTCTTTACTGTCATG  
CCATCCGTAAGATGCTTTTTCTGTGACTGGTGAAGTCAACCAAGTCATTCTGAGAATAGTGTATGCGGCGACCGAG  
TTGCTCTTGGCCGGCGTCAATACGGGATAATACCGCGCCACATAGCAGAACCTTTAAAAGTGCTCATCATTGGAAAAC  
GTTCTTCCGGGGCGAAAACCTCAAGGATCTTACCCTGTTGAGATCCAGTTCGATGTAACCCACTCGTGCACCCAAC  
TGATCTTCAGCATCTTTTACTTTACCAGCGTTTTCTGGGTGAGCAAAAAACAGGAAGGCAAAATGCCGCAAAAAAGGG  
AATAAGGGCGACACGGAATGTTGAATACTCATACTTCTTTTTCAATATTATTGAAGCATTATCAGGGTTATT  
GTCTCATGAGCGGATACATATTTGAATGTATTTAGAAAAATAACAAATAGGGGTTCCGCGCACATTTCCCGAAAA  
GTGCCACCTGAC

*lentiCas9-Blast*

- Gray EFS promoter sequence
- Yellow Human codon-optimized SpCas9 coding sequence
- Italics FLAG peptide tag
- Red P2A bicistronic linker/self-cleaving peptide
- Blue Blast resistance coding sequence

GTCGACGGATCGGGAGATCTCCCGATCCCCTATGGTGCCTCTCAGTACAATCTGCTCTGATGCCGCATAGTTAAGC  
CAGTATCTGCTCCCTGCTTGTGTGTTGGAGGTCGCTGAGTAGTGCGCGAGCAAATTTAAGCTACAACAAGGCAAGG  
CTTGACCGACAATTGCATGAAGAATCTGCTTAGGGTTAGGCGTTTTGCGCTGCTTCGCGATGTACGGGCCAGATATA  
CGCGTTGACATTGATTATTGACTAGTTATTAATAGTAATCAATTACGGGGTCATTAGTTCATAGCCCATATATGGAG  
TTCCGCGTTACATAACTTACGGTAAATGGCCCCGCTGGCTGACCGCCCAACGACCCCGCCCATTTGACGTCAATAAT  
GACGTATGTTCCCATAGTAACGCCAATAGGGACTTTCCATTGACGTCAATGGGTGGAGTATTTACGGTAAACTGCC  
ACTTGGCAGTACATCAAGTGTATCATATGCCAAGTACGCCCCCTATTGACGTCAATGACGGTAAATGGCCCCGCTGG  
CATTATGCCCAGTACATGACCTTATGGGACTTTTCTACTTGGCAGTACATCTACGTATTAGTCATCGCTATTACCAT  
GGTGTATGCGGTTTTGGCAGTACATCAATGGGCGTGGATAGCGGTTTTGACTCACGGGGATTTCCAAGTCTCCACCCCA  
TTGACGTCAATGGGAGTTTTGTTTTGGCACAAAATCAACGGGACTTTCCAAAATGTCGTAACAACCTCCGCCCCATTG  
ACGCAAATGGGCGGTAGGCGGTACGGTGGGAGGTCTATATAAGCAGCGCGTTTTGCCTGTACTGGGTCTCTCTGGT  
TAGACCAGATCTGAGCCTGGGAGCTCTCTGGCTAACTAGGGAACCCACTGCTTAAGCCTCAATAAAGCTTGCCTTGA  
GTGCTTCAAGTAGTGTGTGCCCGTCTGTTGTGTGACTCTGGTAACTAGAGATCCCTCAGACCCTTTTAGTCAGTGTG  
GAAAATCTCTAGCAGTGGCGCCCGAACAGGGACTTGAAAGCGAAAGGGAAACCAGAGGAGCTCTCTCGACGCAGGAC  
TCGGCTTGTGAAGCGCGCACGGCAAGAGGGCAGGGGGCGGCGACTGGTGTGAGTACGCCAAAAATTTTACTAGCGGAG  
GCTAGAAGGAGAGAGATGGGTGCGAGAGCGTCAAGTATTAAGCGGGGGAGAATTAGATCGCGATGGGAAAAAATTCGG  
TTAAGGCCAGGGGAAAGAAAAAATATAAATTAACATATAGTATGGGCAAGCAGGGAGCTAGAACGATTTCGAGT  
TAATCCTGGCCTGTTAGAAACATCAGAAGGCTGTAGACAAATACTGGGACAGCTACAACCATCCCTTCAGACAGGAT  
CAGAAGAATTAGATCATTATATAATACAGTAGCAACCCTCTATTGTGTGCATCAAAGGATAGAGATAAAAGACACC  
AAGGAAGCTTTAGACAAGATAGAGGAAGAGCAAACAAAAGTAAGACCACCGCACAGCAAGCGGCCGCTGATCTTCA  
GACCTGGAGGAGGAGATATGAGGGACAATTGGAGAAGTGAATTATATAAATATAAAGTAGTAAAAATTTGAACCATTA  
GGAGTAGCACCCACCAAGGCAAAGAGAAGAGTGGTGCAGAGAGAAAAAAGAGCAGTGGGAATAGGAGCTTTGTTCTT  
TGGGTTCTTGGGAGCAGCAGGAAGCACTATGGGCGCAGCGTCAATGACGCTGACGGTACAGGCCAGACAATTATTGT  
CTGGTATAGTGCAGCAGCAGAACAATTTGCTGAGGGCTATTGAGGCGCAACAGCATCTGTTGCAACTCACAGTCTGG  
GGCATCAAGCAGCTCCAGGCAAGAATCCTGGCTGTGGAAAGATACCTAAGGATCAACAGCTCCTGGGGATTTGGGG  
TTGCTCTGGAAAACCTCATTTGCACCACTGCTGTGCCTTGGAAATGCTAGTTGGAGTAATAAATCTCTGGAACAGATTT  
GGAATCACAGCACTGGATGGAGTGGACAGAGAATAAACAATTACACAAGCTTAATACACTCCTTAATTTGAAGAA  
TCGAAAACCAGCAAGAAAAGAATGAACAAGAATTATTGGAATTAGATAAATGGGCAAGTTTTGTGGAATTTGGTTAA  
CATAACAAATTTGGCTGTGGTATATAAAATTTTATCATAATGATAGTAGGAGGCTTGGTAGGTTAAGAATAGTTTTTG  
CTGTACTTTCTATAGTGAATAGAGTTAGGCAGGGATATTCACCATTATCGTTTTAGACCCACCTCCCAACCCCGAGG  
GGACCCGACAGGCCCGAAGGAATAGAAGAAGAAGGTGGAGAGAGAGACAGAGACAGATCCATTTCGATTAGTGAACGG  
ATCGGCACTGCGTGCGCCAATTTCTGCAGACAAATGGCAGTATTTCATCCACAATTTTAAAAGAAAAGGGGGATTGGG  
GGGTACAGTGCAGGGGAAAGAATAGTAGACATAATAGCAACAGACATACAACTAAAGAATTACAAAAACAATTTAC  
AAAAATTTAAAATTTTTCGGGTTTTATTACAGGGACAGCAGAGATCCAGTTTTGGTTAATTAAGCTAGCTAGGTCTTGAA  
AGGAGTGGGAATTTGGCTCCGGTGCCTGAGAGAAGGTGGCGCGGGGTAACCTGGGAAAGTGATGTCTGTACTGGCTCCGC  
GGGTCCGCAATTGATCCGGTGCCTAGAGAAGGTGGCGCGGGGTAACCTGGGAAAGTGATGTCTGTACTGGCTCCGC  
CTTTTTCCCGAGGGTGGGGGAGAACCCTATATAAGTGCAGTAGTCGCCGTGAACGTTCTTTTTTCGCAACGGGTTTGC  
CGCCAGAACACAGGACCGGTTCTAGAGCGCTGCCACCATTGGACAAGAAGTACAGCATCGGCCTGGACATCGGCACCA  
ACTCTGTGGGCTGGGCCGTGATCACCGACGAGTACAAGGTGCCAGCAAGAAATTCAGGTGCTGGGCAACACCGAC  
CGGCACAGCATCAAGAAGAACCCTGATCGGAGCCCTGCTGTTTCGACAGCGGCGAAACAGCCGAGGCCACCCGGCTGAA  
GAGAACCGCCAGAAGAAGATACACCAGACGGAAGAACCAGGATCTGCTATCTGCAAGAGATCTTCAGCAACGAGATGG  
CCAAGGTGGACGACAGCTTCTTCCACAGACTGGAAGACTCCTTCTGGTGGAAAGAGGATAAGAAGCAGCAGCGGCAC  
CCCATCTTGGCAACACTCGTGGACGAGGTGGCTACCACGAGAAGTACCCCAACCATCTACCACTGAGAAAGAATACT  
GGTGGACAGACCCGACAAGGCCAGCTGCGGCTGATCTATCTGAGCCCTGGCCACATGATCAAGTTCGGGGCCACT  
TCCTGATCGAGGGCGACCTGAACCCCGACAACAGCGACGTGGACAAGCTGTTTCATCCAGCTGGTGCAGACCTACAAC  
CAGCTGTTTCGAGGAAAACCCCATCAACGCCAGCGGCGTGGACGCCAAGGCCATCCTGTCTGCCAGACTGAGCAAGAG  
CAGACGGCTGGAAAATCTGATCGCCAGCTGCCCGGCGAGAAGAAGAATGGCCTGTTTCGGAACCTGATTGCCCTGA  
GCCTGGGCTGACCCCAACTTCAAGAGCAACTTCGACCTGGCCGAGGATGCCAACTGCAGCTGAGCAAGGACACC  
TACGACGACGACCTGGACAACCTGCTGGCCAGATCGGCGACCAAGTACGCCGACCTGTTTCTGGCCGCAAGAACCT

GTCCGACGCCATCCTGCTGAGCGACATCCTGAGAGTGAACACCGAGATCACCAAGGCCCCCTGAGCGCCTCTATGA  
TCAAGAGATACGACGAGCACCACCAGGACCTGACCCTGCTGAAAGCTCTCGTGCGGCAGCAGCTGCCTGAGAAGTAC  
AAAGAGATTTTCTTCGACCAGAGCAAGAACGGCTACGCCGGCTACATTGACGGCGGAGCCAGCCAGGAAGAGTTCTA  
CAAGTTCATCAAGCCCATCCTGGAAAAGATGGACGGCACCGAGGAAGTCTCGTGAAGCTGAACAGAGAGGACCTGC  
TGCGGAAGCAGCGGACCTTCGACAACGGCAGCATCCCCACCAGATCCACCTGGGAGAGCTGCACGCCATTCTGCGG  
CGGCAGGAAGATTTTACCCATTCTGAAGGACAACCGGAAAAGATCGAGAAGATCCTGACCTTCCGCATCCCCTA  
CTACGTGGGCCCTCTGGCCAGGGGAAACAGCAGATTCGCCTGGATGACCAGAAAAGAGCGGAGGAAACCATCACCCCT  
GGAACCTCGAGGAAGTGGTGGACAAGGGCGCTTCCGCCAGAGCTTCATCGAGCGGATGACCAACTTCGATAAGAAC  
CTGCCAACGAGAAGGTGCTGCCAAGCACAGCTGTGTACGAGTACTTCACCGTGTATAACGAGCTGACCAAAGT  
GAAATACGTGACCGAGGGAATGAGAAAAGCCCGCTTCTGAGCGGCAGCAGAAAAGGCCATCGTGGACCTGCTGT  
TCAAGACCAACCGGAAAGTACCGTGAAGCAGCTGAAAGAGGACTACTTCAAGAAAATCGAGTGCTTCGACTCCGTG  
GAAATCTCCGGCGTGAAGATCGGTTCAACGCCTCCCTGGGCACATACCAGATCTGCTGAAAATTATCAAGGACAA  
GGACTTCTGGACAATGAGGAAAACGAGGACATTCTGGAAGATATCGTGCTGACCCTGACACTGTTTGAGGACAGAG  
AGATGATCGAGGAACGGCTGAAAACCTATGCCACCTGTTTCGACGACAAAAGTGAAGCAGCTGAAGCGGCGGAGA  
TACACCGGCTGGGGCAGGCTGAGCCGGAAGCTGATCAACGGCATCCGGGACAAGCAGTCCGGCAAGACAATCCTGGA  
TTTCTGAAGTCCGACGGCTTCGCCAACAGAACTTCATGCAGCTGATCCACGACGACAGCCTGACCTTTAAGAGG  
ACATCCAGAAAAGCCAGGTGTCCGGCCAGGGCGATAGCCTGCACGAGCACATTGCCAATCTGGCCGGCAGCCCCGCC  
ATTAAGAAGGGCATCCTGCAGACAGTGAAGGTGGTGGACGAGCTCGTGAAGTGATGGGCCGGCACAAGCCCCGAGAA  
CATCGTGATCGAAATGGCCAGAGAGAACCAGACCACCCAGAAGGGACAGAAGAACAGCCGCGAGAGAATGAAGCGGA  
TCGAAGAGGGCATCAAAGAGCTGGGCAGCCAGATCCTGAAAGAACACCCCGTGGAAAACACCCAGCTGCAGAACGAG  
AAGCTGTACCTGTACTACCTGCAGAATGGGCGGGATATGTACGTGGACCAGGAAGTGGACATCAACCGGCTGTCCGA  
CTACGATGTGGACCATATCGTGCTCAGAGCTTCTGAAGGACGACTCCATCGACAACAAGGTGCTGACCAGAAGCG  
ACAAGAACCGGGGCAAGAGCGACAACGTGCCCTCCGAAGAGGTGCTGAAGAAGATGAAGAAGTACTGGCGGCAGCTG  
CTGAACGCCAAGCTGATTACCCAGAGAAAAGTTCGACAATCTGACCAAGGCCGAGAGAGGGCGGCTGAGCGAAGTGG  
TAAGGCGGCTTCATCAAGAGACAGCTGGTGGAAACCCGGCAGATCACAAAGCACGTGGCACAGATCCTGGACTCCC  
GGATGAACATAAGTACGACGAGAATGACAAGTATCGCGGAAGTGAAGTGATCACCTGAAGTCCAAGCTGGTGT  
TCCGATTTCCGGAAGGATTTCCAGTTTTACAAAGTGCAGGATCAACAAGTACCACCAGCCACGACCCCTACCT  
GAACGCCGTGCTGGGAACCGCCTGATCAAAAAGTACCCTAAGCTGGAAAAGCGAGTTCTGTACGGCGACTACAAGG  
TGTACGACGTGCGGAAGATGATCGCCAAGAGCGAGCAGGAAATCGGCAAGGCTACCGCCAAGTACTTCTTCTACAGC  
AACATCATGAACTTTTTCAAGACCGAGATTACCCTGGCCAACGGCGAGATCCGGAAGCGGCCTCTGATCGAGACAAA  
CGGCGAAACCGGGGAGATCGTGTGGGATAAGGGCCGGGATTTTGGCACCGTGCAGGAAAGTGTGAGCATGCCCAAG  
TGAATATCGTGAAGAAGACCGAGGTGCAGACAGGCGGCTTCAGCAAAGAGTCTATCCTGCCCAAGAGGAACAGCGAT  
AAGCTGATCGCCAGAAAAGAGGACTGGGACCCTAAGAAGTACGGCGGCTTCGACAGCCCCACCGTGGCCTATTCTGT  
GCTGGTGGTGGCCAAAGTGGAAAAGGGCAAGTCCAAGAACTGAAGAGTGTGAAAGAGCTGCTGGGGATCACCATCA  
TGGAAAAGAAGCAGCTTCGAGAAGAATCCCATCGACTTCTGGAAGCCAAGGGCTACAAAGAAGTGAAGAAGGACCTG  
ATCATCAAGCTGCCTAAGTACTCCCTGTTTCGAGCTGGAAAACGGCCGGAAGAGAATGCTGGCCTCTGCCGGCGAAGT  
GCAGAAGGGAAACGAAGTGGCCCTGCCCTCCAAATATGTGAACCTTCTGTACCTGGCCAGCCACTATGAGAAGCTGA  
AGGGCTCCCCCGAGGATAATGAGCAGAAAACAGCTGTTTGTGGAACAGCACAAGCACTACCTGGACGAGATCATCGAG  
CAGATCAGCGAGTTCTCCAAGAGAGTGTATCCTGGCCGACGCTAATCTGGACAAAAGTGTGTCCGCCTACAACAAGCA  
CCGGGATAAGCCCATCAGAGAGCAGGCCGAGAATATCATCCACCTGTTTACCCTGACCAATCTGGGAGCCCCCTGCCG  
CCTTCAAGTACTTTGACACCACCATCGACCCGGAAGAGGTACACCAGCACCAAAGAGGTGCTGGACGCCACCCCTGATC  
CACCAGACATCACCGGCCTGTACGAGACAGGATCGACCTGTCTCAGCTGGGAGGCGACAAGCGACCTGCCGCCAC  
AAAGAAGGCTGGACAGGCTAAGAAGAAGAAA *GATTACAAGACGATGACGATAAGGGATCCGGCGCAACAACTTCT*  
*CTCTGCTGAAACAAGCCGGAGATGTGCAAGAGAATCCTGGACCGATGGCCAAGCCTTTGTCTCAAGAAGAATCCACC*  
*CTCATTGAAAGAGCAACGGCTACAATCAACAGCATCCCCATCTCTGAAGACTACAGCGTCGCCAGCGCAGCTCTCTC*  
*TAGCGACGGCCGCATCTTCACTGGTGTCAATGTATATCATTTTTACTGGGGACCTTGTGCAGAAGTGTGGTGTGG*  
*GCACTGCTGCTGCTGCGGCAGCTGGCAACCTGACTTGTATCGTCGCGATCGGAAATGAGAACAGGGGCATCTTGAGC*  
*CCCTGCGGACGGTCCGACAGGTGCTTCTCGATCTGCATCCTGGGATCAAAGCCATAGTGAAGGACAGTGTGGACA*  
*GCCGACGGCAGTTGGGATTCGTGAATTGCTGCCCTCTGGTTATGTGTGGGAGGGCTAAGAATTCGATATCAAGCTTA*  
*TCGATAATCAACCTCTGGATTACAAAATTTGTGAAAGATTGACTGGTATTCTTAAGTATGTTGCTCCTTTTACGCTA*  
*TGTGGATACGCTGCTTTAATGCCTTTGTATCATGCTATTGCTTCCCGTATGGCTTTCAATTTCTCCTCCTTGTATAA*  
*ATCCTGGTTGCTGTCTTTATGAGGAGTTGTGGCCGTTGTGAGGCAACGTGGCGTGGTGTGCACTGTGTTTGGCTG*  
*ACGCAACCCCCACTGGTTGGGGCATTGCCACCACCTGTCAGCTCCTTCCGGGACTTTCGCTTTCCTCCCTCCTATT*  
*GCCACGGCGGAACCTCATCGCCGCTGCCTTGGCCGCTGCTGGACAGGGGCTCGGCTGTTGGGCACTGACAATTCGT*  
*GGTGTGTGCGGGGAAATCATCGTCTTTCTTGGCTGCTCGCCTGTGTTGCCACCTGGATTCTGCGCGGGACGTCTT*  
*TCTGCTACGTCCCTTCGGCCCTCAATCCAGCGGACCTTCTTCCCGCGGCTGCTGCCGGCTCTGCCGCTCTTCCG*  
*CGTCTTCGCTTCGCCCTCAGACGAGTCGGATCTCCCTTTGGGCCGCTCCCCGCATCGATACCGTCGACCTCGAGA*

CCTAGAAAAACATGGAGCAATCACAAAGTAGCAATACAGCAGCTACCAATGCTGATTGTGCCTGGCTAGAAGCACAAAG  
AGGAGGAGGAGGTGGGTTTTCCAGTCACACCTCAGGTACCTTTAAGACCAATGACTTACAAGGCAGCTGTAGATCTT  
AGCCACTTTTTAAAAGAAAAGGGGGGACTGGAAGGGCTAATTCCTCCAACGAAGACAAGATATCCTTGATCTGTG  
GATCTACCACACACAAGGCTACTTCCCTGATTGGCAGAACTACACACCAGGGCCAGGGATCAGATATCCACTGACCT  
TTGGATGGTGTACAAGCTAGTACCAGTTGAGCAAGAGAAGGTAGAAGAAGCCAATGAAGGAGAGAACACCCGCTTG  
TTACACCCTGTGAGCCTGCATGGGATGGATGACCCGGAGAGAGAAGTATTAGAGTGGAGGTTTGACAGCCGCCTAGC  
ATTTTCATCACATGGCCCGAGAGCTGCATCCGGACTGTACTGGGTCTCTCTGGTTAGACCAGATCTGAGCCTGGGAGC  
TCTCTGGCTAACTAGGGAACCCACTGCTTAAGCCTCAATAAAGCTTGCCTTGAGTGCCTCAAGTAGTGTGTGCCCGT  
CTGTTGTGTGACTCTGGTAACACTAGAGATCCCTAGACCCTTTTAGTCAGTGTGAAAATCTCTAGCAGGGCCCCGTTT  
AAACCCGCTGATCAGCTCAGCTGTCCCTTCTAGTCCAGCCATCTGTTGTTTGGCCCTCCCCGTCCTTCTG  
ACCCTGGAAGGTGCCACTCCCCTGTCTTTTCTAATAAAAATGAGGAAATTGCATCGCATTGTCTGAGTAGGTGTCA  
TTCTATTCTGGGGGGTGGGGTGGGGCAGGACAGCAAGGGGGAGGATTGGGAAGACAATAGCAGGCATGCTGGGGATG  
CGGTGGGCTCTATGGCTTCTGAGGCGGAAAGAACCAGCTGGGGCTCTAGGGGGTATCCCCACGCGCCCTGTAGCGGC  
GCATTAAGCGCGGGGGTGTGGTGGTTACGCGCAGCGTGACCGCTACACTTGCCAGCGCCCTAGCGCCCGCTCCTTT  
CGCTTTCTTCCCTTCTTCTCGCCACGTTCCGGCTTTCCCGTCAAGCTCTAAATCGGGGGCTCCCTTTAGGGT  
TCCGATTTAGTGCTTTACGGCACCTCGACCCCAAAAACTTGATTAGGGTGTGTTTACGTAAGTGGGCCATCGCCC  
TGATAGACGGTTTTTCCGCTTTGACGTTGGAGTCCACGTTCTTTAATAGTGGACTCTTGTTCAAAACCTGGAACAAC  
ACTCAACCCTATCTCGGTCTATTCTTTTGAATTTATAAGGGATTTTGGCGATTTCCGCTATTGGTTAAAAAATGAGC  
TGATTTAACAAAAATTTAACGCGAATTAATCTGTGGAATGTGTGTGAGTTAGGGTGTGGAAAGTCCCCAGGCTCCC  
CAGCAGGCAGAAGTATGCAAAGCATGCATCTCAATTAGTCAGCAACCAGGTGTGGAAAGTCCCCAGGCTCCCCAGCA  
GGCAGAAGTATGCAAAGCATGCATCTCAATTAGTCAGCAACCATAGTCCCAGCCCTAACTCCGCCATCCCCGCCCT  
AACTCCGCCAGTTCGCCCCATTCTCCGCCCATGGCTGACTAATTTTTTTTATTTATGCAGAGGCCGAGGCCGCT  
CTGCCTCTGAGCTATTCCAGAAGTAGTGAGGAGGCTTTTTTGGAGGCCTAGGCTTTTGAAAAAGCTCCCGGGAGCT  
TGTATATCCATTTTCGGATCTGATCAGCACGTGTTGACAATTAATCATCGGCATAGTATATCGGCATAGTATAATAC  
GACAAGGTGAGGAATAAACCATGGCCAAGTTGACCAGTCCGCTCCGGTGTCCAGCGCGCGACGCTCGCCGGAGC  
GGTCGAGTTCTGGACCGACCGGCTCGGGTTCTCCGGGACTTCGTGGAGGACGACTTCGCCGGTGTGGTCCGGGACG  
ACGTGACCCTGTTTCATCAGCGCGGTCCAGGACCAGGTGGTCCGGAACAACACCCTGGCCTGGGTGTGGGTGCGCGGC  
CTGGACGAGCTGTACGCCGAGTGGTCCGAGGTCGTGTCCACGAACCTCCGGGACGCCTCCGGGCCGGCCATGACCGA  
GATCGGCGAGCAGCCGTGGGGGCGGGAGTTCGCCCTGCGCGACCCGGCCGCAACTGCGTGCCTTCGTGGCCGAGG  
AGCAGGACTGACACGTGCTACGAGATTTGATTCCACCAGCCGCTTCTATGAAAGGTTGGGCTTCGGAATCGTTTTT  
CGGGACGCCGGCTGGATGATCTCCAGCGCGGGGATCTCATGCTGGAGTTCCTCGCCACCCCAACTTGTTTTATTGC  
AGCTTATAATGGTTACAAATAAAGCAATAGCATCACAAATTTACAAATAAAGCATTTTTTTTTACTGCATTCTAGTT  
GTGGTTTTGTCAAAACCTCATCAATGTATCTTATCATGTCTGTATACCGTCGACCTCTAGCTAGAGCTTGGCGTAATCA  
TGGTCATAGCTGTTTCTGTGTGAAATTTGTTATCCGCTCACAAATTCACACAACATACGAGCCGGAAGCATAAAGTG  
TAAAGCCTGGGGTGCCTAATGAGTGAGCTAACTCACATTAATTCGCTTCCGCTCACTGCCCGCTTTCCAGTCGGGAA  
ACCTGTCTGTCAGCTGCATTAATGAATCGGCCAACGCGCGGGGAGAGGGCGGTTTGGCTATTGGGCGCTCTTCCGCT  
TCCTCGCTCACTGACTCGCTGCGCTCGGTGCTTCCGCTGCGGCGAGCGGTATCAGCTCAAGGCGGTAATACG  
GTTATCCACAGAATCAGGGGATAACGCAGGAAAGAACATGTGAGCAAAAAGGCCAGCAAAAAGGCCAGGAACCGTAAAA  
AGGCCGCGTGTGCTGGCGTTTTTCCATAGGCTCCGCCCCCTGACGAGCATCACAAAAATCGACGCTCAAGTCAGAGG  
TGGCGAAACCCGACAGGACTATAAAGATACCAGGCGTTTTCCCTGGAAGCTCCCTCGTGCCTCTCTGTTCCGAC  
CCTGCCGTTACCGGATACCTGTCCGCTTTCTCCCTCGGGAAGCGTGGCGTTTTCTCATAGCTCAGCTGTAGGT  
ATCTCAGTTCCGTTAGGTGTTGCTTCCGCTCAAGCTGGGCTGTGTGCACGAACCCCGTTCCAGCCGACCGCTGCGCC  
TTATCCGGTAACTATCGTCTTGTAGTCCAACCCGGTAAGACACGACTTATCGCCACTGGCAGCAGCCACTGGTAACAG  
GATTAGCAGAGCGAGGTATGTAGGCGGTGCTACAGAGTTCCTGAAGTGGTGGCCTAACTACGGCTACACTAGAAGAA  
CAGTATTTGGTATCTGCGCTCTGCTGAAGCCAGTTACCTTCGAAAAAGAGTTGGTAGCTCTTGATCCGGCAAACAA  
ACCACCGCTGGTAGCGGTGGTTTTTTTTGTTTGAAGCAGCAGATTACGCGCAGAAAAAAGGATCTCAAGAAGATCC  
TTTGATCTTTTCTACGGGGTCTGACGCTCAGTGAACGAAAACCTCACGTTAAGGGATTTTGGTTCATGAGATTATCAA  
AAAGGATCTTACCTAGATCCTTTTAAATTAATAAAGTAAATCAATCTAAAGTATATATGAGTAAACTTGG  
TCTGACAGTTACCAATGCTTAATCAGTGAGGCACCTATCTCAGCGATCTGTCTATTTTCTTCCATCCATAGTTGCCTG  
ACTCCCCGTCGTGTAGATAACTACGATACGGGAGGGCTTACCATCTGGCCCCAGTGTGCAATGATACCGCGAGACC  
CACGCTCACCGGCTCCAGATTTATCAGCAATAAACCAGCCAGCCGGAAGGGCCGAGCGCAGAAGTGGTCTGCAACT  
TTATCCGCCTCCATCCAGTCTATTAATTGTTGCCGGGAAGCTAGAGTAAGTAGTTCCGCCAGTTAATAGTTTGGC  
CGTGTGTTGCCATTGCTACAGGCATCGTGGTGTACGCTCGTCTGTTGGTATGGCTTCATTCAGCTCCGGTTCCCAAC  
GATCAAGGCGAGTTACATGATCCCCATGTTGTGCAAAAAAGCGGTTAGCTCCTTCCGGTCTCCGATCGTTGTGAGA  
AGTAAGTTGGCCGAGTGTATCACTCATGGTTATGGCAGCACTGCATAATTTCTTACTGTCTATGCCATCCGTAAG  
ATGCTTTTTCTGTGACTGGTGTGACTCAACCAAGTCAATCTGAGAATAGTGTATGCGGCGACCGAGTTGCTCTTGGC  
CGCGTCAATACGGGATAATACCGCGCCACATAGCAGAACCTTTAAAAGTGTCTCATCATTGGAAAACGTTCTTCCGGG

CGAAAACCTCTCAAGGATCTTACCGCTGTTGAGATCCAGTTCGATGTAACCCACTCGTGCACCCAACTGATCTTCAGC  
ATCTTTTACTTTACCAGCGTTTCTGGGTGAGCAAAAACAGGAAGGCAAAATGCCGCAAAAAGGGAATAAGGGCGA  
CACGGAAATGTTGAATACTCATACTCTTCCTTTTTCAATATTATTGAAGCATTATCAGGGTTATTGTCTCATGAGC  
GGATACATATTTGAATGTATTTAGAAAAATAAACAAATAGGGGTTCCGCGCACATTTCCCGAAAAGTGCCACCTGA  
C



*lentiGuide-Puro*

- Pink** BsmBI TypeII sites for cloning in 20bp sgRNA guide sequence after removing 1.8kb spacer sequence
- Green** +85 chrRNA sequence for sgRNA
- Gray** EF1a promoter sequence
- Blue** Puromycin resistance coding sequence

CCCGGGTGCAAAGATGGATAAAGTTTTAAACAGAGAGGAATCTTTGCAGCTAATGGACCTTCTAGGTCTTGAAAGGA  
GTGGGAATTGGCTCCGGTGCCCGTCAGTGGGCAGAGCGCACATCGCCACAGTCCCCGAGAAGTTGGGGGGAGGGGT  
CGGCAATTGATCCGGTGCCTAGAGAAGGTGGCGCGGGGTAAACTGGGAAAGTGATGTCTGTACTGGCTCCGCCTTT  
TTCCCGAGGGTGGGGGAGAACCCTATATAAGTGCAGTAGTCGCCGTGAACGTTCTTTTTCGCAACGGGTTTGGCCG  
AGAACACAGGTAAGTGCCGTGTGTGGTCCCGCGGGCCTGGCCTCTTACGGGTTATGGCCCTTGCCTGCCTTGAAT  
TACTTCCACTGGCTGCAGTACGTGATTCTTGATCCCGAGCTTCGGGTTGGAAGTGGTGGGAGAGTTCGAGGCCTTG  
CGCTTAAGGAGCCCCCTCGCCTCGTGCTTGAGTTGAGGCCTGGCCTGGGCGCTGGGGCCCGCGTGCATCTGTT  
GGCACCTTCGCGCTGTCTCGCTGCTTTCGATAAGTCTCTAGCCATTTAAAATTTTTGATGACCTGTGCGACGCTT  
TTTTTCTGGCAAGATAGTCTTGAAATGCGGGCAAGATCTGCACACTGGTATTTTCGGTTTTTGGGGCCGCGGGCGG  
CGACGGGGCCCGTGCCTCCAGCGCACATGTTCCGGCAGGGCGGGCCTGCGAGCGCGGCCACCGAGAATCGGACGGG  
GGTAGTCTCAAGCTGGCCGGCCTGCTCTGGTGCCTGGCCTCGCGCCGCGTGTATCGCCCCGCCCTGGGCGGCAAGG  
CTGGCCCGGTGCGCACAGTTCGCTGAGCGGAAAGATGGCCGCTTCCCGGCCCTGCTGCAGGGAGCTCAAAATGGAG  
GACGCGGCGCTCGGGAGAGCGGGCGGGTGTGAGTACCCACACAAAGGAAAAGGGCCTTTCGCTCCTCAGCCGTGCTT  
CATGTGACTCCACGGAGTACCGGGCGCGTCCAGGCACCTCGATTAGTTCTCGAGCTTTTGGAGTACGTGCTCTTTA  
GGTTGGGGGAGGGTTTTATGCGATGGAGTTTCCACACTGAGTGGTGGAGACTGAAGTTAGGCCAGCTTGGA  
CTTGATGTAATTTCTCTTGAATTTGCCCTTTTTGAGTTTGGATCTTGGTTTATTCTCAAGCCTCAGACAGTGGTTC  
AAAGTTTTTTCTTCCATTTAGGTGTCGTGACGTACGGCCACCATGACCGAGTACAAGCCCACGGTGCCTCGCC  
ACCCGCGACGACGTCCCCAGGGCCGTACGCACCTCGCCGCGCGTTCGCCGACTACCCCGCCACGCGCCACACCGT  
CGATCCGGACCGCCACATCGAGCGGGTACCGAGCTGCAAGAACTCTTCTCACGCGCGTCCGGCTCGACATCGGCA  
AGGTGTGGGTGCGGACGACGGCGCCGCGTGGCGGTCTGGACCACGCCGGAGAGCGTCAAGCGGGGGCGGTGTT  
GCCGAGATCGGCCCGCGCATGGCCGAGTTGAGCGGTTCCCGGCTGGCCGCGCAGCAACAGATGGAAGGCCTCCTGGC  
GCCGACCGGCCCAAGGAGCCCGCGTGGTCTTCCGCCACCTCGGAGTCTGCCCGACCACAGGGCAAGGGCTGG  
GCAGCCCGTCTGCTCCCCGGAGTGGAGCGCCGAGCGCGCGGGGTGCCCGCTTCTGGAGACCTCCGCGCCC  
CGAACCTCCCCTTACGAGCGGCTCGGCTTACCCTGACCGCCGACGTGAGGTGCCGAAGGACCGCGCACCTG  
GTGCATGACCCGCAAGCCGGTGCCTGAACGCGTTAAGTGCACAATCAACCTCTGGATTACAAAATTTGTGAAAGAT  
TGACTGGTATTCTTAAGTATGTTGCTCCTTTTACGCTATGTGGATACGCTGCTTTAATGCCTTTGTATCATGCTATT  
GCTTCCCGTATGGCTTTTCAATTTCTCCTCCTTGTATAAATCCTGGTTGCTGTCTCTTTATGAGGAGTTGTGGCCGT  
TGTCAGGCAACGTGGCGTGGTGTGACTGTGTTTGTGACGCAACCCCCACTGGTTGGGGCATTGCCACCACCTGTC  
AGCTCCTTTCCGGGACTTTTCGCTTTCCCCCTCCCTATTGCCACGGCGGAACCTCATCGCCGCTGCCTTGGCCGCTGC  
TGGACAGGGGCTCGGCTGTTGGGACTGACAATCCGTGGTGTGTCGGGGAAATCATCGTCTTTTCTTGGCTGCT  
CGCTGTGTTGCCACCTGGATTCTGCGCGGGACGTCTTCTGCTACGTCCCTTCGGCCCTCAATCCAGCGGACCTTC  
CTTCCCGCGGCTGCTGCCGGCTCTGCGGCCTTCCGCGTCTTCGCTTCGCCCTCAGACGAGTGGATCTCCCTT  
TGGGCCGCTCCCGCGCTCGACTTTAAGACCAATGACTTACAAGGCAGCTGTAGATCTTAGCCACTTTTTAAAAGAA  
AAGGGGGGACTGGAAGGGCTAATCACTCCAACGAAGACAAGATCTGCTTTTTGCTTGTACTGGGTCTCTTGTT  
AGACCAGATCTGAGCCTGGGAGCTCTCTGGCTAACTAGGGAACCCACTGCTTAAGCCTCAATAAAGCTTGCTTGAG  
TGCTTCAAGTAGTGTGTGCCCGTCTGTTGTGTGACTCTGGTAACTAGAGATCCCTCAGACCCTTTTAGTCAGTGTGG  
AAAATCTCTAGCAGTACGTATAGTAGTTCATGTATCTTATTATTAGTATTTATAACTTGCAAAGAAATGAATATC  
AGAGAGTGAGAGGAACCTGTTTATTGCAGCTATAATGTTTCAAATAAAGCAATAGCATCACAAATTTACAAATA  
AAGCATTTTTTCACTGCATTTAGTTGTGGTTTTGCCAAACTCATCAATGTATCTTATCATGTCTGGCTTAGCTA  
TCCCGCCCCTAATCCGCCATCCCGCCCCTAATCCGCCAGTTCGCCCATTTCCGCCCTTCCGCCCTAGGCTACTAATT  
TTTTTTATTTATGAGAGGCGGAGGCCGCTCGGCTCTGAGCTATTCCAGAAGTAGTGGAGGCTTTTTTGGAGG  
CCTAGGGACGTACCAATTCGCCCTATAGTGTGCTGATTACGCGCGCTCACTGGCCGTCGTTTTACAACGTGCTGA  
CTGGGAAAACCTGGCGTTACCAACTTAATCGCCTTGCAGCACATCCCCCTTTCGCCAGCTGGCGTAATAGCGAAG  
AGGCCCGCACCGATCGCCCTTCCCAACAGTTGCGCAGCCTGAATGGCGAATGGGACGCGCCCTGTAGCGGCGCATT  
AGCGCGGCGGGTGTGGTGGTTACGCGCAGCGTACCCTACACTTGCAGCGCCCTAGCGCCGCTCCTTTTCGCTTT  
CTTCCCTTCTTTCTCGCCACGTTCCCGGCTTTCGCCGTAAGCTCTAATCGGGGGCTCCCTTTAGGGTCCGAT  
TTAGTGCTTTACGGCACCTCGACCCCAAAAAAATTGATTAGGGTGTGTTTACGTAAGTGGGCCATCGCCCTGATAG  
ACGGTTTTTTCGCCCTTTGACGTTGGAGTCCACGTTCTTTAATAGTGGACTCTTGTTCAAACTGGAACAACACTCAA  
CCCTATCTCGGTCTATTCTTTTGAATTTATAAGGGATTTGCCGATTTCCGCCCTATTGGTTAAAAAATGAGCTGATTT

AACAAAAATTTAACGCGAATTTTAAACAAAATATTAACGCTTACAATTTAGGTGGCACTTTTCGGGGAAATGTGCGCG  
GAACCCCTATTTGTTTTATTTTTCTAAATACATTCAAATATGTATCCGCTCATGAGACAATAACCCTGATAAATGCTT  
CAATAATATTGAAAAAGGAAGAGTATGAGTATTCAACATTTCCGTGTGCGCCTTATTCCCTTTTTTTCGGGCATTTTG  
CCTTCTGTTTTTGGCTCACCCAGAAACGCTGGTGAAGTAAAAGATGCTGAAGATCAGTTGGGTGCACGAGTGGGT  
ACATCGAAGTGGATCTCAACAGCGGTAAGATCCTTGAGAGTTTTTCGCCCGAAGAACGTTTTCCAATGATGAGCACT  
TTTAAAGTTCTGCTATGTGGCGCGGTATTATCCCCTATTGACGCCGGGCAAGAGCAACTCGGTGCGCCGATACACTA  
TTCTCAGAATGACTTGGTTGAGTACTACCAGTACACAGAAAAGCATCTTACGGATGGCATGACAGTAAGAGAATTAT  
GCAGTGTGCCATAACCATGAGTGATAACACTGCGGCCAACTTACTTCTGACAACGATCGGAGGACCGAAGGAGCTA  
ACCGTTTTTTTGCACAACATGGGGGATCATGTAACCTGCCTTGATCGTTGGGAACCGGAGCTGAATGAAGCCATACC  
AAACGACGAGCGTGCACCACGATGCCTGTAGCAATGGCAACAACGTTTCCGAAACTATTAACCTGGCGAATCTTAA  
CTCTAGCTTCCCGCAACAATTAATAGACTGGATGGAGGCGGATAAAGTTGCAGGACCACTTCTGCGCTCGGCCCTT  
CCGGCTGGCTGGTTTTATTGCTGATAAATCTGGAGCCGGTGGAGCTGGGTCTCGCGGTATCATTGCAGCACTGGGGCC  
AGATGGTAAGCCCTCCCCTATCGTAGTTATCTACACGACGGGGAGTCAGGCAACTATGGATGAACGAAATAGACAGA  
TCGCTGAGATAGGTGCCTCACTGATTAAGCATTGGTAACCTGTCAGACCAAGTTTACTCATATATACTTTAGATTGAT  
TTAAAACCTTATTTTTAATTTAAAAGGATCTAGGTGAAGATCCTTTTTGATAATCTCATGACCAAAATCCCTAACG  
TGAGTTTTCGTTCCACTGAGCGTCAGACCCCGTAGAAAAGATCAAAGGATCTTCTTGAGATCCTTTTTTTCTGCGCG  
TAATCTGCTGCTTCAAACAAAAAAACCACCGCTACCAGCGGTGGTTTTGTTTCCCGGATCAAGAGCTACCAACTCTT  
TTTCCGAAGGTAACCTGGCTTTCAGCAGAGCGCAGATACCAAAACTGTTCTTCTAGTGTAGCCGTAGTTAGGCCACCA  
CTTCAAGAACTCTGTAGCACCCTACATACCTCGCTCTGCTAATCCTGTTACCAGTGGCTGCTGCCAGTGGCGATA  
AGTCGTGTCTTACC GGTTGGACTCAAGACGATAGTTACC GGATAAGGCGCAGCGGTGGGCTGAACGGGGGGTTCCG  
TGCACACAGCCCAGCTTGGAGCGAACGACCTACACCGAAGTACCTACAGCGTGAGCTATGAGAAAGCGCCAC  
GCTTCCCGAAGGGAGAAAGGCGGACAGGTATCCGGTAAGCGGCAGGGTCGGAACAGGAGAGCGCACGAGGGGAGCTTC  
CAGGGGGAAACGCCTGGTATCTTTATAGTCTGTGCGGTTTTCCGCACCTCTGACTTGAGCGTCGATTTTTGTGATGC  
TCGTGAGGGGGGGGAGCCTATGGAAAAACGCCAGCAACGCGGCCTTTTTACGGTTCCTGGCCTTTTGTGCGCCTT  
TGCTCACATGTTCTTCTGCGTTATCCCCTGATTTCTGTGGATAACCGTATTACC GCCTTTGAGTGAGCTGATACCG  
CTCGCCGACCGCAACCGAGCGCAGCGAGTCACTGAGCAGGAGGAGCGGAAGAGCGCCCAATACGCAAAACCCCT  
CTCCCCGCGCTTGGCCGATTCTTAATGCAGCTGGCAGCAGAGTTTCCCGACTGGAAGCGGGCAGTGAGCGCAA  
CGCAATTAATGTGAGTTAGCTCACTCATTAGGCACCCAGGCTTTACACTTTATGCTTCCGGCTCGTATGTTGTGTG  
GAATTGTGAGCGGATAACAATTTACACAGGAAACAGCTATGACCATGATTACGCCAAGCGCGCAATTAACCCTCAC  
TAAAGGGAACAAAAGCTGGAGCTGCAAGCTTAATGTAGTCTTATGCAATACTCTTGTAGTCTTGCAACATGGTAACG  
ATGAGTTAGCAACATGCCTTACAAGGAGAGAAAAAGCACCGTGCATGCCGATTGGTGGAAAGTAAGGTGGTACGATCG  
TGCCCTTATTAGGAAGGCAACAGACGGGTCTGACATGGATTGGACGAACCACTGAATTGCCGCATTGCAGAGATATTG  
TATTTAAGTGCCTAGCTCGATACATAAACGGGTCTCTCTGGTTAGACCAGATCTGAGCCTGGGAGCTCTCTGGCTAA  
CTAGGGAACCCACTGCTTAAGCCTCAATAAAGCTTGCCTTGGAGTCTTCAAGTAGTGTGTGCCCGTCTGTTGTGTGA  
CTCTGGTAACCTAGAGATCCCTCAGACCCTTTTAGTCACTGTGGAAAATCTCTAGCAGTGGCGCCGAACAGGGACTT  
GAAAGCGAAAGGGAAACCAGAGGAGCTCTCTCGACGCAGGACTCGGCTTGGTGAAGCGCGCACGGCAAGAGGGCGAGG  
GGCGGCGACTGGTGAGTACGCCAAAAATTTGACTAGCGGAGGCTAGAAGGAGAGAGATGGGTGCGAGAGCGTCACT  
ATTAAGCGGGGGAGAATTAGATCGCGATGGGAAAAAATTCGGTTAAGGCCAGGGGGAAAGAAAAAATAAAATTTAA  
ACATATAGTATGGGCAAGCAGGGAGCTAGAACGATTCGCAGTTAATCCTGGCCTGTTAGAAACATCAGAAGGCTGTA  
GACAAATACTGGGACAGCTACAACCATCCCTTCAGACAGGATCAGAAGAAGCTTAGATCATTATATAACAGTAGCA  
ACCCCTCTATTGTGTGCATCAAAGGATAGAGATAAAAAGACACCAAGGAAGCTTTAGACAAGATAGAGGAAGAGCAAAA  
CAAAAGTAAGACACCCGACAGCAAGCGGCCGCTGATCTTCAGACCTGGAGGAGGATATGAGGGACAATTTGGAGA  
AGTGAATTATATAAATATAAAGTAGTAAAAATTTGAACATTAGGAGTAGCACCCACCAAGGCAAGAGAAAGAGTGGT  
GCAGAGAGAAAAAGAGCAGTGGGAATAGGAGCTTTGTTCTTGGGTTCTTGGGAGCAGCAGGAAGCACTATGGGCG  
CAGCGTCAATGACGCTGACGGTACAGGCCAGACAATTATTGCTGGTATAGTGCAGCAGCAGAACAATTTGCTGAGG  
GCTATTGAGGCGCAACAGCATCTGTTGCAACTCACAGTCTGGGGCATCAAGCAGCTCCAGGCAAGAATCCTGGCTGT  
GGAAAGATACCTAAAGGATCAACAGCTCCTGGGGATTTGGGGTGTCTGGA AAACTCATTGCACTGCTGTGC  
CTTGGAAATGCTAGTTGGAGTAATAAATCTCTGGAACAGATTTGGAATCACACGACCTGGATGGAGTGGGACAGAGAA  
ATTAACAATTACACAAGCTTAATACACTCCTTAATTTGAAGAATCGCAAAACCAGCAAGAAAAGAATGAACAAGAATT  
ATTGGAATTAGATAAATGGGCAAGTTTGTGGAATTTGTTTAAACATAACAAATTTGGCTGTGGTATATAAAATTTATTCA  
TAATGATAGTAGGAGGCTTGGTAGGTTTAAAGAATAGTTTTGCTGTACTTTCTATAGTGAATAGAGTTAGGCAGGGA  
TATTCACCATTATCGTTTTAGACCCACCTCCCAACCCCGAGGGGACCCAGAGAGGGCCTATTTCCCATGATTCCTTC  
ATATTTGCATATACGATACAAGGCTGTTAGAGAGATAATTAGAATTAATTTGACTGTAAACACAAAGATATTAGTAC  
AAAATACGTGACGTAGAAAAGTAATAATTTCTTGGGTAGTTTGCAGTTTTAAAATTTATGTTTTAAAATGGACTATCAT  
ATGCTTACCCTAAGTAAAGTATTTGATTTCTTGGCTTTATATATCTTGTGGAAAGGACGAAACACCGGAGACCG  
TTGTAATGAGCACACAAAATACACATGCTAAAATATTATATTCTATGACCTTTATAAAATCAACCAAAATCTTCTT  
TTAATAACTTTAGTATCAATAATTAGAATTTTTATGTTCTTTTTGCAAACTTTTAATAAAAATGAGCAAAATAAA

AAAACGCTAGTTTTAGTAACTCGCGTTGTTTTCTTCACCTTTAATAATAGCTACTCCACCCTTGTTCCCTAAGCGGT  
CAGCTCCTGCTTCAATCATTTTTGAGCATCTTCAAATGTTCTAACTCCACCAGCTGCTTTAACTAAAGCATTGTCT  
TTAACAACGACTTCATTAGTTAACATCTTCAAATGTTGCACCTGATTTTAAAATCCTGTTGATGTTTTAACAAA  
TTCTAATCCAGCTTCAACAGCTATTTACAAGCTTTCATGATTTCTTCTTTTGTAAATAAACAATTTTCCATAATAC  
ATTTAACAAACATGTGATCCAGCTGCTTTTTTACAGCTTTCATGTCTTCTAAAACCTAATTCATAATTTTTGTCTTTT  
AATGCACCAATATTTAATACCATATCAATTTCTGTTGCACCATCTTTAATTGCTTCAGAACTTCGAATGCTTTTGT  
AGCTGTTGTGCATGCACCTAGAGGAAAACCTACAACATTTGTTATTCCTACATTTGTGCCTTTTAAATAATCTTTAC  
AATAGCTTGTTCATATGAATTAACACAACTGTTGCAAAATCAAATTCATTCATCACATAATGTTTAAAT  
TCAGCTTTCGTAGCATCTTGTAAAAATAATGTGTGATCTATATATTTGTTTGTTCATTTTTCTCCTATATATTC  
ATTTTTAATTTAATTTTAAATAATTTTCTGCTACTTTAACTTTAGCGTTTTGAACAGATTCACCAACACCTATAAA  
ATAAATTTTTAGTTTAGTTTCAGTTCCACTTGGGCGAACAGCAAATCATGACTTATCTTCTAAATAAAATTTTAGTA  
AGTCTTGTCTGGCATATTATACATTCATCGATGTAGCTTCAACATTAACAACCTTAAAGTCCAGCAATTTGAGTT  
AAGGGTGTGCTCTCAATGATTTTCAATGTTTCAATTTTTAATTTCTTTCTGTTTTAAAATTCAGTTTAA  
AGTGAAAGTGTAATATGCACCCATTTCTTTAAATAAATCTTCTAAATAGTCTACTAATGTTTTATTTGTTTTTAT  
AAAATCAAGCAGCCTCTGCTATTAATATAGAAGCTTGTATTCCATCTTTATCTCTAGCTGAGTCATCAATTACATAT  
CCATAACTTTCTTCAAGCAAAAACAAAATTTAATCCGTTATCTTCTTTAGCAATTTCTTACCCATTCATTT  
AAATCCAGTTAAAGTTTTTACAATATTAACCTCCATATTTTTTTCATGAGCGATTCTATCACCCAAATCACTTGTTACAA  
AAGTTGAATATAGAGCCGGATTTTTTGAATGCTATTTAAGCGTTTTAGATTTGATAATTTTCAATCAATTTAAAT  
GGTCTGTTTGATTTCCATCTAATCTTACAAAATGACCATCATGTTTTATTGCCATTCCAAATCTGTCAGCATCTGG  
GTCATTCATAATAATAATATCTGCATCATGTTAATACCATATTCAGCGGTATTTTTTCATGCAGGATCAAATTCCTG  
GATTTGGATTTACAACATTTTTAAATGTTTCATCTTCAAATGCATGCTCTTCAACCTCAATAACGTTATATCCTGAT  
TCACGTAATATTTTTGGGGTAAATTTAGTTCTGTTCCATTAAGTGCAGCTAAAATAATTTTTAAATCTTTTTTAGC  
TTCTTGCTCTTTTTTGTACGCTCTGTTTTAGAGCTAGAAATAGCAAGTTAAAATAAGGCTAGTCCGTTATCAACTT  
GAAAAAGTGGCACCGAGTCGGTGCCTTTTTAAGCTTGGCGTAACTAGATCTTGAGACAAATGGCAGTATTCATCCAC  
AATTTTTAAAAGAAAAGGGGGGATTGGGGGTACAGTGCAGGGGAAAGAATAGTAGACATAATAGCAACAGACATACA  
AACTAAAGAATTACAAAAACAAATTACAAAAATTCAAAATTTTCGGGTTTTATTACAGGGACAGCAGAGATCCACTTT  
GGCGCCGGCTCGAGGGGG

## References

1. Shalem, O. *et al.* Genome-scale CRISPR-Cas9 knockout screening in human cells. *Science* **343**, 84–87 (2014).
2. Trapnell, C., Pachter, L. & Salzberg, S. L. TopHat: discovering splice junctions with RNA-Seq. *Bioinformatics* **25**, 1105–1111 (2009).
3. Trapnell, C. *et al.* Differential gene and transcript expression analysis of RNA-seq experiments with TopHat and Cufflinks. *Nat Protoc* **7**, 562–578 (2012).
4. Merkin, J., Russell, C., Chen, P. & Burge, C. B. Evolutionary dynamics of gene and isoform regulation in Mammalian tissues. *Science* **338**, 1593–1599 (2012).
5. Langmead, B., Trapnell, C., Pop, M. & Salzberg, S. L. Ultrafast and memory-efficient alignment of short DNA sequences to the human genome. *Genome Biol.* **10**, R25 (2009).
6. Hsu, P. D. *et al.* DNA targeting specificity of RNA-guided Cas9 nucleases. *Nat Biotechnol* **31**, 827–832 (2013).
7. Kozomara, A. & Griffiths-Jones, S. miRBase: annotating high confidence microRNAs using deep sequencing data. *Nucleic Acids Res* **42**, D68–73 (2014).
8. Martin, M. Cutadapt removes adapter sequences from high-throughput sequencing reads. *EMBnet.journal* **17**, 10–12 (2011).
